# Supplementary material
Source: HighWire-hosted journal article supplement (https://www.jrheum.org/highwire/filestream/40292/field_highwire_adjunct_files/0/201248DataSuppl.pdf)
Supplement: 201248DataSuppl.pdf [file 201248DataSuppl.pdf]

## ONLINE SUPPLEMENTARY MATERIAL

### SAFETY OF THE METHOTREXATE-LEFLUNOMIDE COMBINATION IN RHEUMATOID ARTHRITIS: RESULTS OF A MULTICENTRIC, REGISTRY-BASED, COHORT STUDY (BIOBADABRASIL).

#### INDEX

|                                                                                                                                                                                                                                                                                                                                        |    |
|----------------------------------------------------------------------------------------------------------------------------------------------------------------------------------------------------------------------------------------------------------------------------------------------------------------------------------------|----|
| Supplementary Table 1. Description of the codification of adverse events using terms described in MEdDRA (Medical Dictionary for Regulatory Activities). Data were transferred to an Excel databank and analyzed using SPSS for Windows version 20.0. The variable SOC refers to 'System Organ Classes' and PtId to 'preferred terms'. | 3  |
| Supplementary Table 2. Description of primary and secondary outcomes.                                                                                                                                                                                                                                                                  | 6  |
| Supplementary Text 1. Data management and quality control.                                                                                                                                                                                                                                                                             | 7  |
| Supplementary Text 2. Additional information on statistical analysis                                                                                                                                                                                                                                                                   | 8  |
| Supplementary Table 3. Results of Cox proportional hazards models testing the associations of the MTX-LEF combo with adverse events in comparison to MTX. Results are expressed as hazards ratios, 95% confidence intervals, and P values.                                                                                             | 9  |
| Supplementary Table 4. Clinical and demographic features of the patients on therapy with the MTX-LEF combination and with biologic agents/JAK inhibitor combined with either MTX or LEF. Data are presented as number (percentage) of patients, except when indicated otherwise.                                                       | 11 |
| Supplementary Table 5. Results of Cox proportional hazards models comparing the hazard of adverse events of the MTX-LEF combo (without biologics or JAK inhibitor) versus biologic agents/JAK inhibitor combined with MTX (without LEF). Results are expressed as hazards ratios, 95% confidence intervals, and P values.              | 13 |
| Supplementary Table 6. Clinical and demographic features of the patients in subgroup analysis comparing the MTX-LEF and MTX-SSZ combinations. Data are presented as number (percentage) of patients, except when indicated otherwise.                                                                                                  | 15 |
| Supplementary Table 7. Results of Cox proportional hazards models (subgroup analysis) comparing the hazard of adverse events between the MTX-LEF combo and the MTX-SSZ combination*.                                                                                                                                                   | 18 |
| Supplementary Table 8. Results of Cox proportional hazards models comparing the hazard of interruption of treatment. Results are expressed as hazards ratios, 95% confidence intervals, and P values.                                                                                                                                  | 20 |
| Supplementary Table 9. Clinical and demographic features of the patients in exploratory analysis comparing treatment with the MTX-LEF combo with MTX or LEF (but not combined) among patients treated with biologic agents or JAK inhibitors. Data are presented as number (percentage) of patients, except when indicated otherwise.  | 23 |
| Supplementary Table 10. Results of Cox proportional hazards models comparing, among patients on biologic or janus kinase inhibitor treatment, the hazard of adverse events between the MTX-LEF combo and use of either MTX or LEF. Results are expressed as hazards ratios, 95% confidence intervals, and P values.                    | 25 |
| Supplementary Text 3. Additional information on Results (sensitivity analyses and tests of proportional hazards assumptions).                                                                                                                                                                                                          | 27 |

doi:10.3899/jrheum.201248.

|                                                                                                                                                                                                                                                                                                                                                                                                                                                          |    |
|----------------------------------------------------------------------------------------------------------------------------------------------------------------------------------------------------------------------------------------------------------------------------------------------------------------------------------------------------------------------------------------------------------------------------------------------------------|----|
| Supplementary Table 11. Results of Cox proportional hazards models comparing the hazard of serious adverse events considering only patients with new combinations of methotrexate and leflunomide and new combinations of cs- and bDMARDs/janus kinase inhibitor (schemes including antimalarials, cyclosporin or sulfasalazine were excluded from this analysis). Results are expressed as hazards ratios, 95% confidence intervals, and P values. .... | 29 |
| Supplementary Table 12. Results of Cox proportional hazards models comparing the hazard of serious adverse events controlling for study center (represented by 28 categories). Results are expressed as hazards ratios, 95% confidence intervals, and P values. ....                                                                                                                                                                                     | 30 |
| Supplementary Table 13. Results of Cox proportional hazards models comparing the hazard of serious adverse events adjusting for concomitant use of different biologic agents or JAK inhibitor taken as individual categorical variables. Results are expressed as hazards ratios, 95% confidence intervals, and P values. ....                                                                                                                           | 32 |
| Supplementary Table 14. Results of Cox proportional hazards models comparing the hazard of serious adverse events of different biologics/JAK inhibitor in comparison to the MTX + LEF combination (reference category; n=195). Results are expressed as hazards ratios, 95% confidence intervals, and P values. ....                                                                                                                                     | 33 |
| Supplementary Figure 1. Log-minus-log (LML) versus time plots testing the assumption of proportional hazards of the analysis on serious adverse events presented in Table 1 (A), Table 2 (B), Supplementary Table 7 (C), and Supplementary Table 10 (D). MTX: methotrexate; LEF: leflunomide; JAKi: Janus kinase inhibitor; SSZ: sulfasalazine. ....                                                                                                     | 36 |
| Supplementary Data 1. Propensity Score Matched Analysis Supplement. ....                                                                                                                                                                                                                                                                                                                                                                                 | 39 |

**Supplementary Table 1.** Description of the codification of adverse events using terms described in MEDDRA (Medical Dictionary for Regulatory Activities). Data were transferred to an Excel databank and analyzed using SPSS for Windows version 20.0. The variable SOC refers to 'System Organ Classes' and Ptid to 'preferred terms'.

Cardiovascular adverse events (variable named CARDIOVASCULAR):

RECODE Ptid ('Embolitic stroke'=1) ('Ischaemic stroke'=1) ('Cerebral ischaemia'=1) ('Cerebral haemorrhage'=1) ('Cerebral infarction'=1) ('Cerebrovascular accident'=1) ('Cerebrovascular insufficiency'=1) ('Cerebellar artery occlusion'=1) INTO STROKE.  
RECODE Ptid ('Brain stem infarction'=1) ('Brain stem ischaemia'=1) ('Cerebral haematoma'=1) ('Cerebrovascular disorder'=1) ('Ischaemic cerebral infarction'=1) ('Ischaemic stroke'=1) ('Ruptured cerebral aneurysm'=1) INTO STROKE.  
RECODE STROKE (1=1) INTO CARDIOVASCULAR.  
RECODE SOC ('Vascular disorders'=1) ('Cardiac disorders'=1) INTO CARDIOVASCULAR.  
RECODE Ptid ('Carotid artery aneurysm'=1) ('Carotid artery stenosis'=1) INTO CARDIOVASCULAR.

Gastrointestinal adverse events (variable named GASTRINT):

RECODE SOC ('Gastrointestinal disorders'=1) INTO GASTRINT.

Respiratory adverse events (variable named RESPIRATORY):

RECODE SOC ('Respiratory, thoracic and mediastinal disorders'=1) INTO RESPIRATORY.

Hepatic adverse events (variable named HEPATIC):

```
RECODE PtlD ('Hepatic enzyme abnormal'=1) ('Alanine aminotransferase
increased'=1)('Hepatic function abnormal'=1) ('Hepatotoxicity'=1) ('Hepatitis toxic'=1)
('Hepatitis'=1) INTO TGOTGP.
RECODE PtlD ('Transaminases abnormal'=1) ('Biliary cirrhosis primary'=1)
('Transaminases increased'=1) ('Hepatocellular damage'=1) ('Hepatic necrosis'=1)
('Hepatic steatosis'=1) ('Hepatitis cholestatic'=1) INTO TGOTGP.
RECODE PtlD ('Hepatic cirrhosis'=1) ('Hepatic fibrosis'=1) ('Hepatic lesion'=1) ('Hepatic
necrosis'=1) ('Hepatic steatosis'=1) ('Hepatic function abnormal'=1) ('Hepatotoxicity'=1)
('Hepatitis toxic'=1) ('Hepatitis'=1) INTO HEPATOCEL.
RECODE PtlD ('Hepatic atrophy'=1) ('Alanine aminotransferase increased'=1) ('Hepatic
enzyme abnormal'=1) ('Hepatitis cholestatic'=1) ('Hepatobiliary disease'=1)
('Hepatocellular damage'=1) INTO HEPATOCEL.
RECODE PtlD ('Biliary cirrhosis primary'=1) ('Autoimmune hepatitis'=1) ('Hepatic
steatosis'=1) INTO HEPATOCEL.
RECODE PtlD ('Hepatic cirrhosis'=1) ('Hepatic fibrosis'=1) ('Hepatic necrosis'=1) ('Biliary
cirrhosis primary'=1) INTO CIRROSEGROUP.
EXECUTE.

COMPUTE HEPATIC=0.
RECODE TGOTGP (1=1) INTO HEPATIC.
RECODE HEPATOCEL (1=1) INTO HEPATIC.
RECODE CIRROSEGROUP (1=1) INTO HEPATIC.
RECODE PtlD ('Portal vein thrombosis'=1) INTO HEPATIC.
RECODE PtlD ('Blood alkaline phosphatase abnormal'=1) ('Blood bilirubin increased'=1)
('Gamma-glutamyltransferase increased'=1) ('Hepatic adenoma'=1) ('Hepatic
arteriovenous malformation'=1) ('Hepatic atrophy'=1) ('Hepatic cyst'=1) INTO HEPATIC.
RECODE PtlD ('Hepatosplenomegaly'=1) ('Hyperbilirubinaemia'=1)
('Hyperphosphatasaemia'=1) ('Jaundice cholestatic'=1) ('Liver disorder'=1) ('Mitochondrial
hepatopathy'=1) ('Polycystic liver disease'=1) ('Haemangioma of liver'=1) INTO HEPATIC.
IF (SOC= 'Infections and infestations') HEPATIC=0.
```

Elevation of hepatic transaminases (variable named TGOTGP):

```
RECODE PtlD ('Hepatic enzyme abnormal'=1) ('Alanine aminotransferase
increased'=1)('Hepatic function abnormal'=1) ('Hepatotoxicity'=1) ('Hepatitis toxic'=1)
('Hepatitis'=1) INTO TGOTGP.
RECODE PtlD ('Transaminases abnormal'=1) ('Transaminases increased'=1)
('Hepatocellular damage'=1) ('Hepatic necrosis'=1) INTO TGOTGP.
```

Hematologic adverse events (variable named HEMATO):

RECODE Ptld ('Acute leukaemia'=1) ('Acute myeloid leukaemia'=1) ('Anaemia'=1) ('Anaemia folate deficiency'=1) ('Anaemia macrocytic'=1) ('Anaemia megaloblastic'=1) INTO HEMATO.

RECODE Ptld ('Anaemia of chronic disease'=1) ('Anaemia vitamin B12 deficiency'=1) ('Aplasia pure red cell'=1) ('Blood disorder'=1) ('Bone marrow depression'=1) ('Bone marrow disorder'=1) INTO HEMATO.

RECODE Ptld ('Bone marrow toxicity'=1) ('Chronic lymphocytic leukaemia'=1) ('='=1) ('Haematotoxicity'=1) ('Haemoglobin decreased'=1) ('Haemolytic anaemia'=1) INTO HEMATO.

RECODE Ptld ('Haemorrhagic disorder'=1) ('Iron deficiency anaemia'=1) ('Leukopenia'=1) ('Lymphoma cutis'=1) ('Lymphopenia'=1) ('Microcytic anaemia'=1) INTO HEMATO.

RECODE Ptld ('Multiple myeloma'=1) ('Myelodysplastic syndrome'=1) ('Neutropenia'=1) ('Neutropenic infection'=1) ('Lymphopenia'=1) ('Pancytopenia'=1) INTO HEMATO.

RECODE Ptld ('Pernicious anaemia'=1) ('Platelet destruction increased'=1) ('Platelet disorder'=1) ('Platelet production decreased'=1) ('Lymphopenia'=1) ('Thrombocytopenia'=1) ('White blood cell disorder'=1) INTO HEMATO.

RECODE Ptld ('Neutrophilia'=1) ('Leukocytosis'=1) ('Platelet disorder'=1) ('Platelet production decreased'=1) ('Neutrophil count decreased'=1) INTO HEMATO.

RECODE Ptld ('Thrombocythaemia'=1) ('Eosinophil count increased'=1) ('Eosinophilia'=1) ('Normochromic normocytic anaemia'=1) INTO HEMATO.

Neutropenia (variable named NEUTROPENIA):

RECODE Ptld ('Bone marrow depression'=1) INTO NEUTROPENIA.

RECODE Ptld ('Bone marrow toxicity'=1) ('Haematotoxicity'=1) INTO NEUTROPENIA.

RECODE Ptld ('Leukopenia'=1) INTO NEUTROPENIA.

RECODE Ptld ('Neutropenia'=1) ('Neutropenic infection'=1) ('Pancytopenia'=1) INTO NEUTROPENIA.

RECODE Ptld ('White blood cell disorder'=1) INTO NEUTROPENIA.

RECODE Ptld ('Neutrophil count decreased'=1) INTO NEUTROPENIA.

Anemia (variable named ANEMIA):

RECODE Ptld ('Anaemia'=1) ('Anaemia folate deficiency'=1) ('Anaemia macrocytic'=1) ('Anaemia megaloblastic'=1) INTO ANEMIA.

RECODE Ptld ('Anaemia of chronic disease'=1) ('Anaemia vitamin B12 deficiency'=1) ('Aplasia pure red cell'=1) ('Pancytopenia'=1) INTO ANEMIA.

RECODE Ptld ('Haemoglobin decreased'=1) ('Haemolytic anaemia'=1) INTO ANEMIA.

RECODE Ptld ('Iron deficiency anaemia'=1) ('Microcytic anaemia'=1) INTO ANEMIA.

RECODE Ptld ('Pernicious anaemia'=1) INTO ANEMIA.

RECODE Ptld ('Normochromic normocytic anaemia'=1) INTO ANEMIA.

Infectious adverse events (variable named INFECTION):

RECODE SOC ('Infections and infestations'=1) INTO INFECTION.

| <b>Supplementary Table 2. Description of primary and secondary outcomes.</b>                |                                                                                                                              |                                        |                                                                                              |
|---------------------------------------------------------------------------------------------|------------------------------------------------------------------------------------------------------------------------------|----------------------------------------|----------------------------------------------------------------------------------------------|
| Primary outcome                                                                             | Secondary outcomes                                                                                                           | Secondary outcomes of special interest | Other secondary outcomes                                                                     |
| Serious adverse events (first SAE of any kind)                                              | Fatal adverse events                                                                                                         | Anemia (including pancytopenia)        | Interruption of treatment course for any reason (except for pregnancy and disease remission) |
|                                                                                             | Total (any) adverse event (first AE event of any kind and degree of seriousness)                                             | Neutropenia (including pancytopenia)   | Interruption of therapy course due to inefficacy                                             |
|                                                                                             | Cardiovascular events*:<br>- First serious cardiovascular AE<br>- First cardiovascular AE of any degree of seriousness       | Elevation of hepatic transaminases     | Interruption of treatment course due to adverse events or death                              |
|                                                                                             | Infectious events :<br>- First serious infection<br>- First infection of any degree of seriousness                           |                                        |                                                                                              |
|                                                                                             | Hepatic events*:<br>- First hepatic serious AE<br>- First hepatic AE of any degree of seriousness                            |                                        |                                                                                              |
|                                                                                             | Hematologic events:<br>- First serious hematologic AE<br>- First hematologic AE of any degree of seriousness                 |                                        |                                                                                              |
|                                                                                             | Respiratory tract events*:<br>- First serious respiratory AE<br>- First respiratory AE of any degree of seriousness          |                                        |                                                                                              |
|                                                                                             | Gastrointestinal events*:<br>- First serious gastrointestinal AE<br>- First gastrointestinal AE of any degree of seriousness |                                        |                                                                                              |
| *Excluding infections. This exclusion does not apply to hematologic adverse because febrile |                                                                                                                              |                                        |                                                                                              |

neutropenia/pancytopenia may be implicated in the etiology of infectious events. SAE: serious adverse event; AE: adverse event.

### **Supplementary Text 1.** Data management and quality control

A 3-domain online platform was used for data entry: 1- demographics, disease characteristics, and comorbidities; 2- treatment course, recording the medications used in the therapy of RA and screening of contact with tuberculosis; 3- adverse events, with outcome information (Brazilian Society of Rheumatology. Manual BiobadaBrasil versão 2.1, available at <https://biobadaser.ser.es/biobadamerica/Brasil/cgi-bin/upload/archivo.aspx?id=10>). Data entry was responsibility of each center; data were compulsorily updated in case of an adverse event or treatment modification. A specifically trained monitor, employee of the Brazilian Society of Rheumatology, maintains a constant 3-level data quality control program: 1- digital, using the platform resources in a daily basis; 2- by phone, contacting all reachable registered patients at least once a year; 3- in loco, yearly, comparing registry data and medical files of 20% of patients randomly selected in each center (Cecconi et al. *J Clin Rheum* 2020;26:73-8). Adverse events identified during the annual phone contact should have its details verified during medical consultations.

## **Supplementary Text 2. Additional information on statistical analysis**

The assumption of proportional hazards was tested using log-minus-log plots using the variables of interest (the main study factors) as stratification variables in Cox models. Observing roughly parallelism between the curves of the strata confirms that the proportional hazards assumption is adequately fulfilled.

For propensity score matched analysis, which was performed including all potential confounding variables (see Methods) plus study center, we used greedy nearest neighbor matching without replacement using calipers of width equal to or less than 0.2 of the standard deviation of the logit of the propensity score.

Missing data (occurring exclusively in the variable baseline DAS28 in only 7 patients) were assumed to occur completely at random and were handled using replacement by the mean.



| <b>Supplementary Table 3.</b> Results of Cox proportional hazards models testing the associations of the MTX-LEF combo with adverse events in comparison to MTX. Results are expressed as hazards ratios, 95% confidence intervals, and P values. |               |                                                                         |                              |
|---------------------------------------------------------------------------------------------------------------------------------------------------------------------------------------------------------------------------------------------------|---------------|-------------------------------------------------------------------------|------------------------------|
|                                                                                                                                                                                                                                                   |               | MTX-LEF combo (n=452) versus MTX (n=766; reference category)<br>n=1671* |                              |
| Type of adverse event (number of events)                                                                                                                                                                                                          |               | Crude analysis                                                          | Adjusted for covariates†     |
| Total serious adverse events (298)                                                                                                                                                                                                                |               | 1.05 (0.80 to 1.39), P=0.712                                            | 1.02 (0.77 to 1.36), P=0.890 |
| Fatal adverse events (26)                                                                                                                                                                                                                         |               | 1.21 (0.49 to 3.02), P=0.676                                            | 1.23 (0.44 to 3.46), P=0.691 |
| Any adverse event (854)                                                                                                                                                                                                                           |               | 1.24 (1.06 to 1.45), P=0.009                                            | 1.29 (1.10 to 1.52), P=0.002 |
| Cardiovascular‡                                                                                                                                                                                                                                   | Serious (40)  | 1.07 (0.53 to 2.15), P=0.851                                            | 0.88 (0.41 to 1.89), P=0.740 |
|                                                                                                                                                                                                                                                   | Total (106)   | 1.64 (1.06 to 2.52), P=0.025                                            | 1.45 (0.92 to 2.28), P=0.105 |
| Infections                                                                                                                                                                                                                                        | Serious (144) | 1.18 (0.80 to 1.75), P=0.397                                            | 1.25 (0.83 to 1.87), P=0.281 |

|                    |              |                              |                              |
|--------------------|--------------|------------------------------|------------------------------|
|                    | Total (458)  | 1.16 (0.94 to 1.44), P=0.170 | 1.28 (1.02 to 1.60), P=0.031 |
| Hepatic‡           | Serious (8)  | ND                           | ND                           |
|                    | Total (42)   | 1.40 (0.71 to 2.79), P=0.330 | 1.35 (0.66 to 2.75), P=0.411 |
| Hematologic        | Serious (12) | 1.35 (0.36 to 5.02), P=0.657 | ND                           |
|                    | Total (49)   | 1.50 (0.76 to 2.94), P=0.238 | 1.33 (0.66 to 2.66), P=0.423 |
| Respiratory tract‡ | Serious (16) | 0.74 (0.23 to 2.40), P=0.617 | ND                           |
|                    | Total (57)   | 0.87 (0.46 to 1.66), P=0.669 | 1.00 (0.52 to 1.95), P=0.993 |
| Gastrointestinal‡  | Serious (15) | 1.11 (0.31 to 3.93), P=0.872 | ND                           |
|                    | Total (102)  | 1.10 (0.70 to 1.74), P=0.671 | 1.03 (0.64 to 1.65), P=0.896 |

\*These analyses include 1671 patients, since 156 patients taking neither MTX nor LEF and 297 patients taking leflunomide were accounted for in the analyses. †Adjusted also for age, baseline DAS28, disease duration, gender, current smoking, seropositivity for RF or anti-CCP, history of malignancy, diabetes, hypertension, hypercholesterolemia, renal failure, ischemic cardiomyopathy, COPD, heart failure, use of sulfasalazine, antimalarials, biologic DMARDs/tofacitinib, corticosteroids, starting year, hypercholesterolemia, osteoporosis, hepatitis B and C. ‡Excluding infections of any kind. MTX: methotrexate; LEF: leflunomide; ND: not done due to small number of events (<10 for crude analysis and <20 for multivariate analysis); RF: rheumatoid factor; CCP: cyclic citrullinated peptide.

**Supplementary Table 4.** Clinical and demographic features of the patients on therapy with the MTX-LEF combination and with biologic agents/JAK inhibitor combined with either MTX or LEF. Data are presented as number (percentage) of patients, except when indicated otherwise.

|                                         | MTX-LEF combination<br>(without biologics or JAK inhibitor)<br>(n=195) | Biologic agents/JAK inhibitor combined with MTX<br>(n=535) | Biologic agents/JAK inhibitor combined with LEF<br>(n=240) | P Value* |
|-----------------------------------------|------------------------------------------------------------------------|------------------------------------------------------------|------------------------------------------------------------|----------|
| Female                                  | 168 (86.2)                                                             | 452 (84.5)                                                 | 210 (87.5)                                                 | 0.526    |
| Age (years) – mean (SD)                 | 49.9 (12.7)                                                            | 50.8 (11.6)                                                | 52.6 (11.6)                                                | 0.045    |
| Disease duration (years) – median (IQR) | 2.7 (0.5-10.2)                                                         | 6.3 (2.8 to 13.0)                                          | 7.9 (3.9-14.9)                                             | <0.001   |

|                                   |            |            |            |        |
|-----------------------------------|------------|------------|------------|--------|
| Seropositive RA (RF or anti-CCP)  | 166 (85.1) | 477 (89.2) | 204 (85.0) | 0.161  |
| DAS28 at baseline – mean (SD)     | 5.0 (1.4)  | 5.3 (1.5)  | 5.2 (1.4)  | 0.008  |
| Current smoking                   | 28 (14.4)  | 74 (13.8)  | 26 (10.8)  | 0.452  |
| History of malignancy             | 4 (2.1)    | 4 (0.7)    | 4 (1.7)    | 0.269  |
| Diabetes                          | 20 (10.3)  | 59 (11.0)  | 42 (17.5)  | 0.024  |
| Hypertension                      | 72 (36.9)  | 182 (34.0) | 110 (45.8) | 0.007  |
| Hypercholesterolemia              | 28 (14.4)  | 58 (10.8)  | 46 (19.2)  | 0.007  |
| Osteoporosis                      | 30 (15.4)  | 70 (13.1)  | 38 (15.8)  | 0.524  |
| Hepatitis C                       | 0 (0.0)    | 1 (0.2)    | 0 (0.0)    | 1.000  |
| Hepatitis B                       | 0 (0.0)    | 4 (0.7)    | 1 (0.4)    | 0.832  |
| Kidney failure                    | 1 (0.5)    | 4 (0.7)    | 2 (0.8)    | 1.000  |
| Ischemic cardiomyopathy           | 3 (1.5)    | 9 (1.7)    | 5 (2.1)    | 0.895  |
| COPD                              | 4 (2.1)    | 10 (1.9)   | 7 (2.9)    | 0.661  |
| Heart failure                     | 2 (1.0)    | 3 (0.6)    | 2 (0.8)    | 0.675  |
| Corticosteroid                    | 169 (86.7) | 418 (78.1) | 189 (78.8) | 0.033  |
| Hydroxychloroquine or chloroquine | 56 (28.7)  | 119 (22.2) | 27 (11.2)  | <0.001 |
| Sulfasalazine                     | 2 (1.0)    | 13 (2.4)   | 7 (2.9)    | 0.397  |
| Anti-TNF agents                   | 0 (0.0)    | 457 (85.4) | 212 (88.3) | <0.001 |
| Other biologics**                 | 0 (0.0)    | 51 (9.5)   | 18 (7.5)   | <0.001 |
| JAK Inhibitor (tofacitinib)       | 0 (0.0)    | 27 (5.0)   | 10 (4.2)   | 0.007  |

|                                                                                                                                                                                                                                                                                                                                                                                                                                                                                                                              |              |              |              |        |
|------------------------------------------------------------------------------------------------------------------------------------------------------------------------------------------------------------------------------------------------------------------------------------------------------------------------------------------------------------------------------------------------------------------------------------------------------------------------------------------------------------------------------|--------------|--------------|--------------|--------|
| Starting year – mean (SD)                                                                                                                                                                                                                                                                                                                                                                                                                                                                                                    | 2011.8 (2.8) | 2012.4 (3.1) | 2013.0 (3.0) | <0.001 |
| <p>*Pearson chi-square, Fisher’s exact test, Student <i>t</i> test or Mann-Whitney test according to the nature and distribution of data. ** Other biologics are abatacept, rituximab or tocilizumab. MTX: methotrexate; LEF: leflunomide; SD: standard deviation; IQR: interquartile range; RA: rheumatoid arthritis; RF: rheumatoid factor; CCP: cyclic citrullinated peptide; DAS28: Disease Activity Score in 28 joints; COPD: chronic obstructive pulmonary disease; TNF: tumor necrosis factor; JAK: Janus kinase.</p> |              |              |              |        |

|                                                                                                                                                                                                                                                                                                                                         |                                                                                                                        |
|-----------------------------------------------------------------------------------------------------------------------------------------------------------------------------------------------------------------------------------------------------------------------------------------------------------------------------------------|------------------------------------------------------------------------------------------------------------------------|
| <p><b>Supplementary Table 5.</b> Results of Cox proportional hazards models comparing the hazard of adverse events of the MTX-LEF combo (without biologics or JAK inhibitor) versus biologic agents/JAK inhibitor combined with MTX (without LEF). Results are expressed as hazards ratios, 95% confidence intervals, and P values.</p> |                                                                                                                        |
|                                                                                                                                                                                                                                                                                                                                         | <p>MTX-LEF (n=195) versus biologic agents/JAK inhibitor combined with MTX (n=535; reference category)</p> <p>n=730</p> |

| Type of adverse event (number of events) |              | Crude analysis               | Adjusted for covariates†     |
|------------------------------------------|--------------|------------------------------|------------------------------|
| Total serious adverse events (112)       |              | 0.64 (0.41 to 1.00), P=0.049 | 0.58 (0.36 to 0.94), P=0.028 |
| Fatal adverse events (9)                 |              | ND                           | ND                           |
| Any adverse event (380)                  |              | 0.86 (0.68 to 1.08), P=0.191 | 0.82 (0.64 to 1.04), P=0.094 |
| Cardiovascular‡                          | Serious (15) | 1.12 (0.38 to 3.28), P=0.841 | ND                           |
|                                          | Total (40)   | 1.32 (0.69 to 2.51), P=0.397 | 0.95 (0.47 to 1.92), P=0.893 |
| Infections                               | Serious (57) | 0.54 (0.28 to 1.05), P=0.069 | 0.47 (0.23 to 0.95), P=0.035 |
|                                          | Total (213)  | 0.70 (0.51 to 0.96), P=0.025 | 0.69 (0.50 to 0.97), P=0.033 |
| Hepatic‡                                 | Serious (1)  | ND                           | ND                           |
|                                          | Total (20)   | 1.51 (0.62 to 3.70), P=0.368 | 1.86 (0.70 to 4.99), P=0.216 |
| Hematologic                              | Serious (4)  | ND                           | ND                           |
|                                          | Total (22)   | 1.54 (0.66 to 3.60), P=0.323 | 1.58 (0.62 to 3.99), P=0.334 |
| Respiratory tract‡                       | Serious (8 ) | ND                           | ND                           |
|                                          | Total (25 )  | 0.71 (0.28 to 1.77), P=0.459 | 0.73 (0.25 to 2.09), P=0.553 |
| Gastrointestinal‡                        | Serious (4)  | ND                           | ND                           |
|                                          | Total (47)   | 1.00 (0.54 to 1.84), P=0.990 | 0.99 (0.52 to 1.92), P=0.985 |

†Adjusted also for age, baseline DAS28, disease duration, gender, current smoking, seropositivity for RF or anti-CCP, history of malignancy, diabetes, hypertension, hypercholesterolemia, renal failure, ischemic cardiomyopathy, COPD, heart failure, use of sulfasalazine, antimalarials, corticosteroids, starting year, hypercholesterolemia, osteoporosis, hepatitis B and C. ‡Excluding infections of any kind. MTX: methotrexate; LEF: leflunomide; ND: not done due to small number of events (<10 for crude analysis and <20 for multivariate analysis); RF: rheumatoid factor; CCP: cyclic citrullinated peptide.

| <b>Supplementary Table 6.</b> Clinical and demographic features of the patients in subgroup analysis comparing the MTX-LEF and MTX-SSZ combinations. Data are presented as number (percentage) of patients, except when indicated otherwise. |                               |                                |          |
|----------------------------------------------------------------------------------------------------------------------------------------------------------------------------------------------------------------------------------------------|-------------------------------|--------------------------------|----------|
|                                                                                                                                                                                                                                              | MTX-SSZ combination<br>(n=31) | MTX-LEF combination<br>(n=440) | P Value* |
|                                                                                                                                                                                                                                              |                               |                                |          |

|                                         |               |                |        |
|-----------------------------------------|---------------|----------------|--------|
| Female                                  | 26 (83.9)     | 382 (86.8)     | 0.589  |
| Age (years) – mean (SD)                 | 43.5 (12.9)   | 50.7 (11.6)    | 0.001  |
| Disease duration (years) – median (IQR) | 2.6 (0.8-7.6) | 5.7 (1.8-12.3) | 0.024  |
| Seropositive RA (RF or anti-CCP)        | 26 (83.9)     | 358 (81.4)     | 0.728  |
| DAS28 at baseline – mean (SD)           | 5.4 (1.5)     | 5.1 (1.4)      | 0.227  |
| Current smoking                         | 5 (16.1)      | 78 (17.7)      | 0.821  |
| History of malignancy                   | 3 (9.7)       | 6 (1.4)        | 0.017  |
| Diabetes                                | 3 (9.7)       | 57 (13.0)      | 0.784  |
| Hypertension                            | 7 (22.6)      | 173 (39.3)     | 0.064  |
| Hypercholesterolemia                    | 2 (6.5)       | 67 (15.2)      | 0.290  |
| Osteoporosis                            | 4 (12.9)      | 74 (16.8)      | 0.571  |
| Hepatitis C                             | 0 (0.0)       | 1 (0.2)        | 1.000  |
| Hepatitis B                             | 0 (0.0)       | 2 (0.5)        | 1.000  |
| Kidney failure                          | 0 (0.0)       | 1 (0.2)        | 1.000  |
| Ischemic cardiomyopathy                 | 0 (0.0)       | 5 (1.1)        | 1.000  |
| COPD                                    | 2 (6.5)       | 12 (2.7)       | 0.233  |
| Heart failure                           | 1 (3.2)       | 4 (0.9)        | 0.290  |
| Corticosteroid                          | 27 (87.1)     | 371 (84.3)     | 0.803  |
| Hydroxychloroquine or chloroquine       | 22 (71.0)     | 105 (23.9)     | <0.001 |
| Anti-TNF agents                         | 13 (41.9)     | 233 (53.0)     | 0.235  |



|                             |              |              |       |
|-----------------------------|--------------|--------------|-------|
| Other biologics**           | 0 (0.0)      | 11 (2.5)     | 1.000 |
| JAK Inhibitor (tofacitinib) | 0 (0.0)      | 3 (0.7)      | 1.000 |
| Starting year – mean (SD)   | 2011.9 (2.3) | 2012.1 (2.7) | 0.707 |

\*Pearson chi-square, Fisher's exact test, Student *t* test or Mann-Whitney test according to the nature and distribution of data. \*\* Other biologics are abatacept, rituximab or tocilizumab.

MTX: methotrexate; LEF: leflunomide; SSZ: sulfasalazine; SD: standard deviation; IQR: interquartile range; RA: rheumatoid arthritis; RF: rheumatoid factor; CCP: cyclic citrullinated peptide; DAS28: Disease Activity Score in 28 joints; COPD: chronic obstructive pulmonary disease; TNF: tumor necrosis factor; JAK Janus kinase.

| <b>Supplementary Table 7.</b> Results of Cox proportional hazards models (subgroup analysis) comparing the hazard of adverse events between the MTX-LEF combo and the MTX-SSZ combination*. |              |                                                        |                                                       |                                                         |                              |
|---------------------------------------------------------------------------------------------------------------------------------------------------------------------------------------------|--------------|--------------------------------------------------------|-------------------------------------------------------|---------------------------------------------------------|------------------------------|
| Type of adverse event (number of events)                                                                                                                                                    |              | MTX + LEF<br>(n=440)<br>Rate per 100<br>PY<br>(95% CI) | MTX + SSZ<br>(n=31)<br>Rate per 100<br>PY<br>(95% CI) | Hazards ratios, 95% confidence intervals, and P values. |                              |
|                                                                                                                                                                                             |              |                                                        |                                                       | Crude analysis                                          | Adjusted for covariates†     |
| Total serious adverse events (90)                                                                                                                                                           |              | 5.2 (4.2 to 6.4)                                       | 18.1 (10.8 to 30.2)                                   | 0.32 (0.18 to 0.59), P<0.001                            | 0.33 (0.16 to 0.65), P=0.002 |
| Fatal adverse events (7)                                                                                                                                                                    |              | 0.4 (0.2 to 0.9)                                       | 0 (NA)                                                | ND                                                      | ND                           |
| Any adverse event (259)                                                                                                                                                                     |              | 25.7 (23.0 to 28.6)                                    | 33.3 (22.6 to 49.1)                                   | 0.88 (0.54 to 1.44), P=0.618                            | 0.80 (0.46 to 1.37), P=0.408 |
| Cardiovascular events‡                                                                                                                                                                      | Serious (15) | 0.8 (0.5 to 1.3)                                       | 2.5 (0.6 to 9.9)                                      | 0.31 (0.07 to 1.38), P=0.123                            | ND                           |
|                                                                                                                                                                                             | Total (41)   | 2.4 (1.8 to 3.3)                                       | 2.5 (0.6 to 9.9)                                      | 1.01 (0.24 to 4.21), P=0.987                            | 0.64 (0.14 to 2.98), P=0.574 |
| Infections                                                                                                                                                                                  | Serious (46) | 2.6 (1.9 to 3.5)                                       | 6.5 (2.8 to 15.1)                                     | 0.45 (0.18 to 1.14), P=0.090                            | 0.61 (0.21 to 1.73), P=0.352 |
|                                                                                                                                                                                             | Total (138)  | 10.4 (8.8 to 12.2)                                     | 11.3 (5.9 to 21.7)                                    | 1.0 (0.49 to 2.04), P=0.997                             | 0.94 (0.43 to 2.03), P=0.868 |
| Hepatic events‡                                                                                                                                                                             | Serious (3)  | 0.2 (0.1 to 0.5)                                       | 0 (NA)                                                | ND                                                      | ND                           |
|                                                                                                                                                                                             | Total (14)   | 0.8 (0.5 to 1.4)                                       | 0 (NA)                                                | ††                                                      | ND                           |

|                           |                |                  |                   |                              |                              |
|---------------------------|----------------|------------------|-------------------|------------------------------|------------------------------|
| Hematologic events        | Serious<br>(3) | 0.2 (0.1 to 0.6) | 0 (NA)            | ND                           | ND                           |
|                           | Total (18)     | 0.9 (0.6 to 1.5) | 3.6 (1.2 to 11.0) | 0.26 (0.08 to 0.90), P=0.033 | ND                           |
| Respiratory tract events‡ | Serious<br>(3) | 0.2 (0.1 to 0.6) | 0 (NA)            | ND                           | ND                           |
|                           | Total (12)     | 0.7 (0.4 to 1.3) | 0 (NA)            | ††                           | ND                           |
| Gastrointestinal events‡  | Serious<br>(4) | 0.2 (0.1 to 0.6) | 1.1 (0.2 to 8.3)  | ND                           | ND                           |
|                           | Total (33)     | 1.8 (1.3 to 2.6) | 3.6 (1.2 to 10.9) | 0.54 (0.16 to 1.77), P=0.307 | 0.38 (0.10 to 1.45), P=0.156 |

\*See description of patients' features in Supplementary Table 6. †Adjusted also for age, baseline DAS28, disease duration, gender, current smoking, seropositivity for RF or anti-CCP, history of malignancy, diabetes, hypertension, hypercholesterolemia, renal failure, ischemic cardiomyopathy, COPD, heart failure, antimalarials, biologic DMARDs/tofacitinib, corticosteroids, starting year, hypercholesterolemia, osteoporosis, hepatitis B and C. ‡Excluding infections of any kind. †† Analysis rendered extreme limits of 95% CI ranging from <0.01 to >100000. MTX: methotrexate; LEF: leflunomide; SSZ: sulfasalazine; ND: not done due to small number of events (<10 for crude analysis and <20 for multivariate analysis); RF: rheumatoid factor; CCP: cyclic citrullinated peptide; NA: not applicable.

| <b>Supplementary Table 8.</b> Results of Cox proportional hazards models comparing the hazard of interruption of treatment. Results are expressed as hazards ratios, 95% confidence intervals, and P values. |                                                                                               |                                 |
|--------------------------------------------------------------------------------------------------------------------------------------------------------------------------------------------------------------|-----------------------------------------------------------------------------------------------|---------------------------------|
| <b>Cause of treatment interruption (number of events)</b>                                                                                                                                                    | <b>Crude analysis</b>                                                                         | <b>Adjusted for covariates*</b> |
|                                                                                                                                                                                                              | MTX-LEF combo versus a category representing use of either MTX or LEF (reference)**<br>n=1671 |                                 |
| For any reason, except for pregnancy or disease remission (921)                                                                                                                                              | 1.04 (0.90 to 1.21),<br>P=0.552                                                               | 1.11 (0.96 to 1.29),<br>P=0.174 |
| Due to inefficacy (450)                                                                                                                                                                                      | 1.06 (0.87 to 1.31),<br>P=0.557                                                               | 1.12 (0.90 to 1.38),<br>P=0.311 |
| Due to adverse events or death (232)                                                                                                                                                                         | 1.04 (0.77 to 1.39),<br>P=0.819                                                               | 1.18 (0.87 to 1.60),<br>P=0.275 |

|                                                                 |                                                                                                                           |                                 |
|-----------------------------------------------------------------|---------------------------------------------------------------------------------------------------------------------------|---------------------------------|
|                                                                 | MTX-LEF combo versus biologic agents/JAK inhibitor (combined with either MTX or LEF; reference category)<br>n=970         |                                 |
| For any reason, except for pregnancy or disease remission (542) | 0.80 (0.65 to 0.99),<br>P=0.043                                                                                           | 0.76 (0.61 to 0.95),<br>P=0.016 |
| Due to inefficacy (274)                                         | 0.90 (0.67 to 1.19),<br>P=0.448                                                                                           | 0.84 (0.62 to 1.12),<br>P=0.237 |
| Due to adverse events or death (130)                            | 0.34 (0.19 to 0.62),<br>P<0.001                                                                                           | 0.31 (0.17 to 0.58),<br>P<0.001 |
|                                                                 | MTX-LEF combo versus MTX-SSZ combo (reference category)<br>n=471                                                          |                                 |
| For any reason, except for pregnancy or disease remission (287) | 0.62 (0.41 to 0.96),<br>P=0.031                                                                                           | 0.62 (0.39 to 0.98),<br>P=0.042 |
| Due to inefficacy (144)                                         | 0.71 (0.38 to 1.36),<br>P=0.306                                                                                           | 0.75 (0.37 to 1.53),<br>P=0.431 |
| Due to adverse events or death (66)                             | 0.59 (0.26 to 1.38),<br>P=0.224                                                                                           | 0.38 (0.15 to 0.96),<br>P=0.040 |
|                                                                 | Patients on treatment with biologic agents or tofacitinib: MTX-LEF combo versus MTX or LEF (reference category)<br>n=1032 |                                 |
| For any reason, except for pregnancy or disease remission (595) | 1.14 (0.96 to 1.37),<br>P=0.142                                                                                           | 1.19 (0.99 to 1.44),<br>P=0.064 |

|                                      |                                 |                                 |
|--------------------------------------|---------------------------------|---------------------------------|
| Due to inefficacy (287)              | 1.07 (0.82 to 1.39),<br>P=0.631 | 1.12 (0.85 to 1.46),<br>P=0.428 |
| Due to adverse events or death (171) | 1.37 (0.99 to 1.89),<br>P=0.058 | 1.40 (1.00 to 1.96),<br>P=0.053 |

\*Adjusted for age, baseline DAS28, disease duration, gender, current smoking, seropositivity for RF or anti-CCP, history of malignancy, diabetes, hypertension, hypercholesterolemia, renal failure, ischemic cardiomyopathy, COPD, heart failure, use of sulfasalazine (if appropriate), antimalarials, biologic DMARDs/tofacitinib (if appropriate), corticosteroids, starting year, hypercholesterolemia, osteoporosis, hepatitis B and C. \*\*Adjusted for a category representing absence of MTX and LEF. MTX: methotrexate; LEF: leflunomide; JAK: Janus kinase; SSZ: sulfasalazine; RF: rheumatoid factor; CCP: cyclic citrullinated peptide.

**Supplementary Table 9.** Clinical and demographic features of the patients in exploratory analysis comparing treatment with the MTX-LEF combo with MTX or LEF (but not combined) among patients treated with biologic agents or JAK inhibitors. Data are presented as number (percentage) of patients, except when indicated otherwise.

|                                            | Either MTX or LEF (plus<br>Biologic agents/JAK<br>inhibitor)<br>(n=775) | MTX-LEF combination<br>(plus Biologic<br>agents/JAK inhibitor)<br>(n=257) | P Value* |
|--------------------------------------------|-------------------------------------------------------------------------|---------------------------------------------------------------------------|----------|
| Female                                     | 662 (85.4)                                                              | 225 (87.5)                                                                | 0.395    |
| Age (years) – mean (SD)                    | 51.4 (11.7)                                                             | 51.4 (10.7)                                                               | 0.966    |
| Disease duration (years) –<br>median (IQR) | 7.0 (3.1-13.4)                                                          | 7.6 (4.1-13.1)                                                            | 0.245    |
| Seropositive RA (RF or<br>anti-CCP)        | 681 (87.9)                                                              | 201 (78.2)                                                                | <0.001   |
| DAS28 at baseline – mean<br>(SD)           | 5.3 (1.5)                                                               | 5.2 (1.3)                                                                 | 0.196    |
| Current smoking                            | 100 (12.9)                                                              | 51 (19.8)                                                                 | 0.006    |
| History of malignancy                      | 8 (1.0)                                                                 | 2 (0.8)                                                                   | 1.000    |
| Diabetes                                   | 101 (13.0)                                                              | 38 (14.8)                                                                 | 0.475    |
| Hypertension                               | 292 (37.7)                                                              | 104 (40.5)                                                                | 0.426    |

|                                   |              |              |        |
|-----------------------------------|--------------|--------------|--------|
| hypercholesterolemia              | 104 (13.4)   | 43 (16.7)    | 0.188  |
| Osteoporosis                      | 108 (13.9)   | 44 (17.1)    | 0.212  |
| Hepatitis C                       | 1 (0.1)      | 1 (0.4)      | 0.436  |
| Hepatitis B                       | 5 (0.6)      | 2 (0.8)      | 0.687  |
| Kidney failure                    | 6 (0.8)      | 0 (0.0)      | 0.346  |
| Ischemic cardiomyopathy           | 14 (1.8)     | 2 (0.8)      | 0.383  |
| COPD                              | 17 (2.2)     | 8 (3.1)      | 0.406  |
| Heart failure                     | 5 (0.6)      | 2 (0.8)      | 0.687  |
| Corticosteroid                    | 607 (78.3)   | 211 (82.1)   | 0.195  |
| Hydroxychloroquine or chloroquine | 146 (18.8)   | 51 (19.8)    | 0.722  |
| Sulfasalazine                     | 20 (2.6)     | 10 (3.9)     | 0.279  |
| Anti-TNF agents                   | 669 (86.3)   | 243 (94.6)   | <0.001 |
| Other biologics**                 | 69 (8.9)     | 11 (4.3)     | 0.016  |
| JAK Inhibitor (tofacitinib)       | 37 (4.8)     | 3 (1.2)      | 0.009  |
| Starting year – mean (SD)         | 2012.6 (3.1) | 2012.3 (2.6) | 0.212  |

\*Pearson chi-square, Fisher's exact test, Student *t* test, or Mann-Whitney test according to the nature and distribution of data. \*\* Other biologics are abatacept, rituximab or tocilizumab. MTX: methotrexate; LEF: leflunomide; SD: standard deviation; IQR: interquartile range; RA: rheumatoid arthritis; RF: rheumatoid factor; CCP: cyclic citrullinated peptide; DAS28: Disease Activity Score in 28 joints; COPD: chronic obstructive pulmonary disease; TNF: tumor necrosis factor; JAK: Janus kinase.



| <b>Supplementary Table 10.</b> Results of Cox proportional hazards models comparing, among patients on biologic or janus kinase inhibitor treatment, the hazard of adverse events between the MTX-LEF combo and use of either MTX or LEF. Results are expressed as hazards ratios, 95% confidence intervals, and P values. |                                                                                                                                               |                              |
|----------------------------------------------------------------------------------------------------------------------------------------------------------------------------------------------------------------------------------------------------------------------------------------------------------------------------|-----------------------------------------------------------------------------------------------------------------------------------------------|------------------------------|
|                                                                                                                                                                                                                                                                                                                            | Patients on treatment with biologic agents or tofacitinib: MTX-LEF combo (n=257) versus MTX or LEF (n=775; reference category)<br><br>n=1032* |                              |
| Type of adverse event (number of events)                                                                                                                                                                                                                                                                                   | Crude analysis                                                                                                                                | Adjusted for covariates†     |
| Total serious adverse events (189)                                                                                                                                                                                                                                                                                         | 1.41 (1.03 to 1.92),<br>P=0.030                                                                                                               | 1.36 (0.98 to 1.87), P=0.066 |
| Fatal adverse events (13)                                                                                                                                                                                                                                                                                                  | 1.93 (0.63 to 5.91),<br>P=0.248                                                                                                               | ND                           |
| Any adverse event (562)                                                                                                                                                                                                                                                                                                    | 1.24 (1.03 to 1.49),<br>P=0.024                                                                                                               | 1.21 (1.00 to 1.46), P=0.050 |

|                           |              |                                 |                              |
|---------------------------|--------------|---------------------------------|------------------------------|
| Cardiovascular events‡    | Serious (19) | 2.20 (0.88 to 5.47),<br>P=0.090 | ND                           |
|                           | Total (63)   | 2.19 (1.33 to 3.62),<br>P=0.002 | 2.04 (1.21 to 3.41), P=0.007 |
| Infections                | Serious (99) | 1.50 (0.99 to 2.29),<br>P=0.058 | 1.40 (0.90 to 2.19), P=0.138 |
|                           | Total (319)  | 1.22 (0.95 to 1.56),<br>P=0.116 | 1.18 (0.91 to 1.52), P=0.207 |
| Hepatic events‡           | Serious (5)  | ND                              | ND                           |
|                           | Total (22)   | 1.44 (0.59 to 3.54),<br>P=0.422 | 1.68 (0.66 to 4.23), P=0.273 |
| Hematologic events        | Serious (4)  | ND                              | ND                           |
|                           | Total (27)   | 1.07 (0.45 to 2.53),<br>P=0.881 | 1.03 (0.42 to 2.51), P=0.949 |
| Respiratory tract events‡ | Serious (9)  | ND                              | ND                           |
|                           | Total (33)   | 1.01 (0.46 to 2.24),<br>P=0.979 | 0.96 (0.42 to 2.24), P=0.933 |
| Gastrointestinal events‡  | Serious (9)  | ND                              | ND                           |
|                           | Total (60)   | 1.13 (0.64 to 2.00),<br>P=0.679 | 1.14 (0.64 to 2.04), P=0.651 |

\*See description of patients` features in Supplementary Table 9. †Adjusted also for age, baseline DAS28, disease duration, gender, current smoking, seropositivity for RF or anti-CCP, history of malignancy, diabetes, hypertension, hypercholesterolemia, renal failure, ischemic cardiomyopathy, COPD, heart failure, use of sulfasalazine, antimalarials, corticosteroids, starting year, hypercholesterolemia, osteoporosis, hepatitis B and C. ‡Excluding infections of any kind. MTX: methotrexate; LEF: leflunomide; SSZ: sulfasalazine; ND: not done due to small number of events (<10 for crude analysis and <20 for multivariate analysis); RF: rheumatoid factor; CCP: cyclic citrullinated peptide; CI: confidence interval.

**Supplementary Text 3.** Additional information on Results (sensitivity analyses and tests of proportional hazards assumptions).

We performed sensitivity analysis excluding patients with less than 6 months of follow-up, and so eliminating adverse events that could have possibly been recorded retrospectively. The results of multivariate analysis for serious adverse events (SAEs) were similar to the original analysis (MTX-LEF combo versus MTX or LEF, 220 SAEs, adj. HR, 1.14, 0.83 to 1.55, P=0.422, n=1470; MTX-LEF combo versus biologics/tofacitinib (plus MTX or LEF), 118 SAE, adj. HR, 0.66, 0.40 to 1.07, P=0.094, n=867).

We also performed a sensitivity analysis for the primary outcome (SAEs) in which we compared patients on the MTX-LEF combo with biologics/tofacitinib with MTX or LEF, but excluding patients receiving treatment with sulfasalazine, cyclosporin, or antimalarials. Considering that patients could only be included at the start of treatment with a biologic, JAK inhibitor, or escalation of treatment by the addition of a new non-biologic DMARD, excluding patients on sulfasalazine, cyclosporin or antimalarials would guaranty that the MTX-LEF combo represent a new simultaneous use of both drugs. The results are shown in Supplementary Table 11. Supplementary Table 12 shows the results for SAEs controlled for study center. In another sensitivity analysis (Supplementary Table 13), we

Online supplement to: Safety of the Methotrexate-Leflunomide Combination in Rheumatoid Arthritis: Results of a Multicentric, Registry-Based, Cohort Study (BIOBADABRASIL). *The Journal of Rheumatology*. doi:10.3899/jrheum.201248.

adjusted the results for biologics agents/JAK inhibitor considering these medications individually as different categorical variables, and not as a single binary variable as previously done. In all these sensitivity analyses, the overall results were not significantly changed in relation to those demonstrated before.

Supplementary Table 14 shows the comparison of hazard of SAEs between the MTX-LEF combo and individual biologics or tofacitinib (in association or not with MTX or LEF), adjusted and not adjusted for possible confounding variables. There was a significantly higher hazard of SAEs with infliximab, adalimumab, and tocilizumab comparing to MTX plus LEF. Comparing the MTX-LEF combo with biologics/tofacitinib (again as a single group, but independent from the use or not of MTX or LEF; reference category), the adjusted hazard ratio for SAEs is 0.50, 95% CI, 0.32 to 0.78, P=0.002.

The test of the proportional hazards assumption (PHA) was made for multivariate survival analyses whose outcome was SAEs (Tables 1 and 2 and Supplementary Tables 7 and 10). The log-minus-log plots relative to the analyses enumerated before in this paragraph are shown in Supplementary Figure A to D, confirming the fulfillment of the PHA.

**Supplementary Table 11.** Results of Cox proportional hazards models comparing the hazard of serious adverse events considering only patients with new combinations of methotrexate and leflunomide and new combinations of cs- and bDMARDs/janus kinase inhibitor (schemes including antimalarials, cyclosporin or sulfasalazine were excluded from this analysis). Results are expressed as hazards ratios, 95% confidence intervals, and P values.

| Type of adverse event (number of events) | Crude analysis                                                                                                                                                      | Adjusted for covariates*        |
|------------------------------------------|---------------------------------------------------------------------------------------------------------------------------------------------------------------------|---------------------------------|
|                                          | MTX-LEF combo (n=335) versus a category representing use of either MTX or LEF (n=807; reference)<br>n=1245**                                                        |                                 |
| Serious adverse events (219)             | 1.02 (0.76 to 1.38), P=0.873                                                                                                                                        | 0.98 (0.71 to 1.35),<br>P=0.892 |
|                                          | MTX-LEF combo (without biologics or JAK inhibitor; n=137) versus biologic agents/JAK inhibitor combined with either MTX or LEF (n=618; reference category)<br>n=755 |                                 |

|                              |                                                                                                                                         |                                 |
|------------------------------|-----------------------------------------------------------------------------------------------------------------------------------------|---------------------------------|
| Serious adverse events (125) | 0.61 (0.37 to 1.01), P=0.055                                                                                                            | 0.50 (0.29 to 0.84),<br>P=0.010 |
|                              | Patients on treatment with biologic agents or tofacitinib: MTX-LEF combo (n=198) versus MTX or LEF (n=618; reference category)<br>n=816 |                                 |
| Serious adverse events (151) | 1.36 (0.96 to 1.94), P=0.086                                                                                                            | 1.30 (0.90 to 1.88),<br>P=0.161 |

\*Adjusted for age, baseline DAS28, disease duration, gender, current smoking, seropositivity for RF or anti-CCP, history of malignancy, diabetes, hypertension, hypercholesterolemia, renal failure, ischemic cardiomyopathy, COPD, heart failure, antimalarials, biologic DMARDs/tofacitinib (if appropriate), corticosteroids, starting year, hypercholesterolemia, osteoporosis, hepatitis B and C. \*\*These analyses are adjusted for a category representing absence of MTX and LEF (n=103), and so the total number of patients is 1245. DMARDs: disease modifying anti-rheumatic drugs; Cs- and bDMARDs: conventional synthetic and biologic DMARDs; MTX: methotrexate; LEF: leflunomide; JAK: Janus kinase; RF: rheumatoid factor; CCP: cyclic citrullinated peptide.

**Supplementary Table 12.** Results of Cox proportional hazards models comparing the hazard of serious adverse events controlling for study center (represented by 28 categories). Results are expressed as hazards ratios, 95% confidence intervals, and P values.

| Type of adverse event (number of events) | Crude analysis* | Adjusted for covariates** |
|------------------------------------------|-----------------|---------------------------|
|------------------------------------------|-----------------|---------------------------|

|                              |                                                                                                                                                                             |                                 |
|------------------------------|-----------------------------------------------------------------------------------------------------------------------------------------------------------------------------|---------------------------------|
|                              | <p>MTX-LEF combo (n=452) versus a category representing use of either MTX or LEF (n=1063; reference)<br/>n=1671†</p>                                                        |                                 |
| Serious adverse events (298) | 0.85 (0.64 to 1.12),<br>P=0.249                                                                                                                                             | 0.87 (0.66 to 1.17),<br>P=0.362 |
|                              | <p>MTX-LEF combo (without biologics or JAK inhibitor; n=195) versus biologic agents/JAK inhibitor combined with either MTX or LEF (n=775; reference category)<br/>n=970</p> |                                 |
| Serious adverse events (156) | 0.48 (0.30 to 0.76),<br>P=0.002                                                                                                                                             | 0.46 (0.28 to 0.74),<br>P=0.001 |
|                              | <p>MTX-LEF combo (n=440) versus MTX-SSZ combo (n=31; reference category)<br/>n=471</p>                                                                                      |                                 |
| Serious adverse events (90)  | 0.50 (0.20 to 1.21),<br>P=0.124                                                                                                                                             | 0.50 (0.19 to 1.26),<br>P=0.141 |
|                              | <p>Patients on treatment with biologic agents or tofacitinib: MTX-LEF combo (n=257) versus MTX or LEF (n=775; reference category)<br/>n=1032</p>                            |                                 |
| Serious adverse events (189) | 1.08 (0.76 to 1.56),<br>P=0.660                                                                                                                                             | 1.06 (0.73 to 1.54),<br>P=0.748 |

\*Adjusted for study center. \*\*Adjusted for age, baseline DAS28, disease duration, gender, current smoking, seropositivity for RF or anti-CCP, history of malignancy, diabetes, hypertension, renal failure, ischemic cardiomyopathy, heart failure, chronic pulmonary obstructive disease, and concomitant use of sulfasalazine (where appropriate), biologics/tofacitinib (if appropriate), antimalarials, corticosteroids, starting year, hypercholesterolemia, osteoporosis, hepatitis B and C, and study center. †These analyses include 1671 patients and are adjusted for a category representing absence of MTX and LEF (n=156). MTX: methotrexate; LEF: leflunomide; JAK: Janus kinase; SSZ: sulfasalazine; RF: rheumatoid factor; CCP: cyclic citrullinated peptide.

**Supplementary Table 13.** Results of Cox proportional hazards models comparing the hazard of serious adverse events adjusting for concomitant use of different biologic agents or JAK inhibitor taken as individual categorical variables. Results are expressed as hazards ratios, 95% confidence intervals, and P values.

| Type of adverse event (number of events) | Crude analysis*                                                                                              | Adjusted for covariates**       |
|------------------------------------------|--------------------------------------------------------------------------------------------------------------|---------------------------------|
|                                          | MTX-LEF combo (n=452) versus a category representing use of either MTX or LEF (n=1063; reference)<br>n=1671† |                                 |
| Serious adverse events (298)             | 1.05 (0.81 to 1.37), P=0.707                                                                                 | 0.97 (0.74 to 1.28),<br>P=0.849 |
|                                          | MTX-LEF combo (n=440) versus MTX-SSZ combo (n=31; reference category)<br>n=471                               |                                 |
| Serious adverse events (90)              | 0.25 (0.13 to 0.47), P<0.001                                                                                 | 0.25 (0.12 to 0.51),<br>P<0.001 |



\*Adjusted for use of infliximab, etanercept, adalimumab, golimumab, certolizumab, abatacept, rituximab, tocilizumab, and tofacitinib. \*\*Adjusted for age, baseline DAS28, disease duration, gender, current smoking, seropositivity for RF or anti-CCP, history of malignancy, diabetes, hypertension, renal failure, ischemic cardiomyopathy, heart failure, chronic pulmonary obstructive disease, and concomitant use of infliximab, etanercept, adalimumab, golimumab, certolizumab, abatacept, rituximab, tocilizumab, tofacitinib, sulfasalazine (where appropriate), antimalarials, corticosteroids, starting year, hypercholesterolemia, osteoporosis, hepatitis B and C. †These analyses include 1671 patients and are adjusted for a category representing absence of MTX and LEF (n=156). MTX: methotrexate; LEF: leflunomide; JAK: Janus kinase; SSZ: sulfasalazine; RF: rheumatoid factor; CCP: cyclic citrullinated peptide.

**Supplementary Table 14.** Results of Cox proportional hazards models comparing the hazard of serious adverse events of different biologics/JAK inhibitor in comparison to the MTX + LEF combination (reference category; n=195). Results are expressed as hazards ratios, 95% confidence intervals, and P values.

| Biologic agent/JAK inhibitor (always in combination with either MTX or LEF) | Crude analysis*              | Adjusted for covariates*†    |
|-----------------------------------------------------------------------------|------------------------------|------------------------------|
| Infliximab (n=172)                                                          | 2.64 (1.62 to 4.31), P<0.001 | 2.68 (1.61 to 4.47), P<0.001 |

|                                                                      |                              |                              |
|----------------------------------------------------------------------|------------------------------|------------------------------|
| Adalimumab (n=246)                                                   | 1.56 (0.95 to 2.57), P=0.077 | 1.49 (0.88 to 2.50), P=0.135 |
| Etanercept (n=158)                                                   | 1.35 (0.77 to 2.36), P=0.297 | 1.43 (0.80 to 2.54), P=0.230 |
| Golimumab (n=37)                                                     | 0.85 (0.26 to 2.84), P=0.797 | 1.16 (0.33 to 4.06), P=0.818 |
| Certolizumab (n=56)                                                  | 0.89 (0.31 to 2.56), P=0.823 | 1.11 (0.35 to 3.46), P=0.861 |
| Rituximab (n=30)                                                     | 1.32 (0.46 to 3.78), P=0.612 | 1.70 (0.56 to 5.17), P=0.348 |
| Abatacept (n=17)                                                     | 1.17 (0.28 to 4.94), P=0.834 | 1.89 (0.43 to 8.40), P=0.401 |
| Tocilizumab (n=22)                                                   | 2.71 (1.17 to 6.26), P=0.020 | 3.63 (1.50 to 8.78), P=0.004 |
| Tofacitinib (n=37)                                                   | ††                           | ††                           |
|                                                                      |                              |                              |
| Biologic agent/JAK inhibitor (in combination or not with MTX or LEF) | Crude analysis€              | Adjusted for covariates€†    |
| Infliximab (n=199)                                                   | 2.58 (1.60 to 4.18), P<0.001 | 2.91 (1.76 to 4.79), P<0.001 |
| Adalimumab (n=277)                                                   | 1.65 (1.02 to 2.67), P=0.043 | 1.78 (1.07 to 2.94), P=0.026 |
| Etanercept (n=189)                                                   | 1.67 (1.00 to 2.79), P=0.051 | 1.69 (0.99 to 2.91), P=0.056 |
| Golimumab (n=40)                                                     | 0.79 (0.24 to 2.61), P=0.694 | 1.15 (0.33 to 4.00), P=0.822 |
| Certolizumab (n=63)                                                  | 0.95 (0.36 to 2.50), P=0.923 | 1.29 (0.46 to 3.63), P=0.628 |
| Rituximab (n=45)                                                     | 1.52 (0.66 to 3.51), P=0.330 | 1.31 (0.53 to 3.22), P=0.554 |
| Abatacept (n=24)                                                     | 1.27 (0.38 to 4.23), P=0.693 | 1.76 (0.50 to 6.13), P=0.376 |
| Tocilizumab (n=27)                                                   | 2.66 (1.20 to 5.89), P=0.016 | 3.26 (1.40 to 7.56), P=0.006 |
| Tofacitinib (n=56)                                                   | 0.19 (0.03 to 1.42), P=0.105 | 0.31 (0.04 to 2.40), P=0.262 |

\*Includes 970 patients who suffered 156 events. †Adjusted also for age, baseline DAS28, disease duration, gender, current smoking, seropositivity for RF or anti-CCP, history of malignancy, diabetes, hypertension, hypercholesterolemia, renal failure, ischemic cardiomyopathy, COPD, heart failure, use of sulfasalazine, antimalarials, corticosteroids, starting year, hypercholesterolemia, osteoporosis, hepatitis B and C. ††Analysis rendered extreme limits of 95% CI ranging from <0.01 to >100000. €Includes 1115 patients who suffered 187 events. MTX: methotrexate; LEF: leflunomide; SSZ: sulfasalazine; ND: not done due to small number of events (<10 for crude analysis and <20 for multivariate analysis); RF: rheumatoid factor; CCP: cyclic citrullinated peptide; CI: confidence interval.

**Supplementary Figure 1.** Log-minus-log (LML) versus time plots testing the assumption of proportional hazards of the analysis on serious adverse events presented in Table 1 (A), Table 2 (B), Supplementary Table 7 (C), and Supplementary Table 10 (D). MTX: methotrexate; LEF: leflunomide; JAKi: Janus kinase inhibitor; SSZ: sulfasalazine.

A

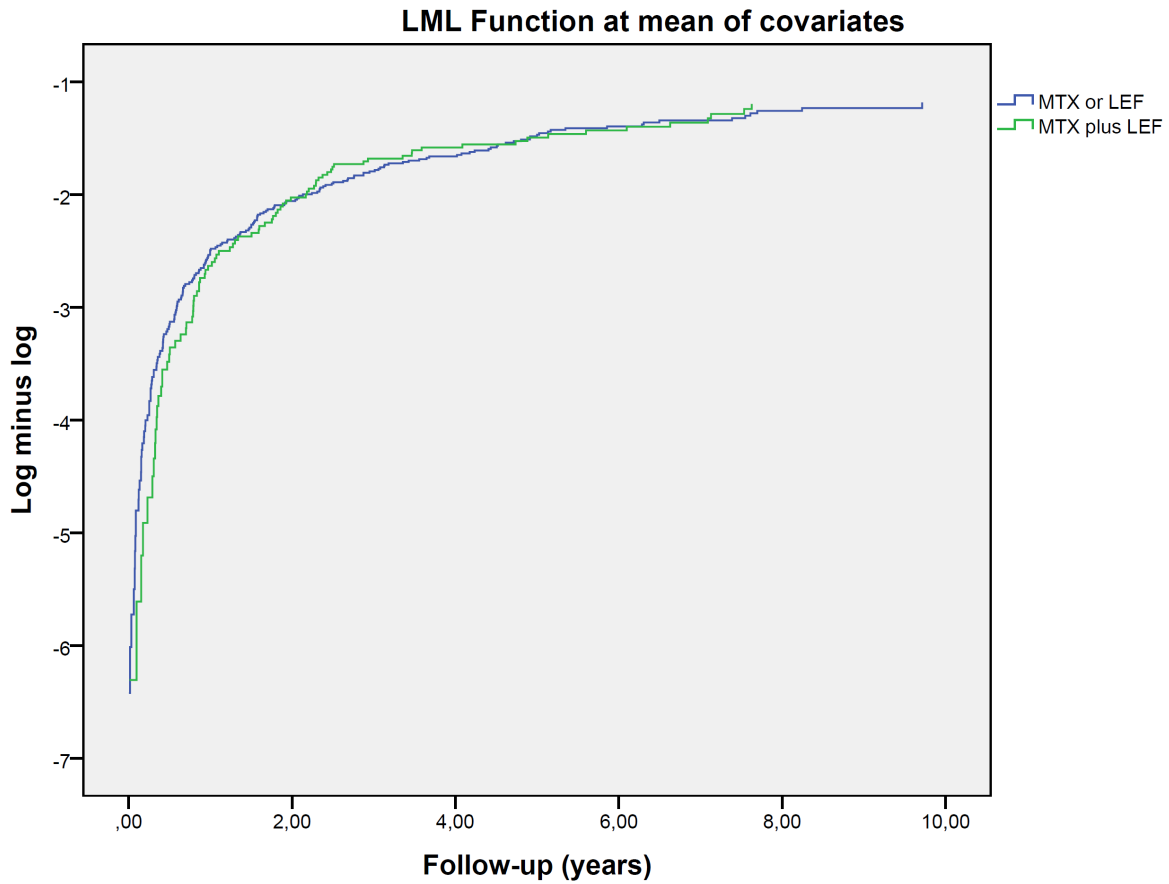

doi:10.3899/jrheum.201248.

B

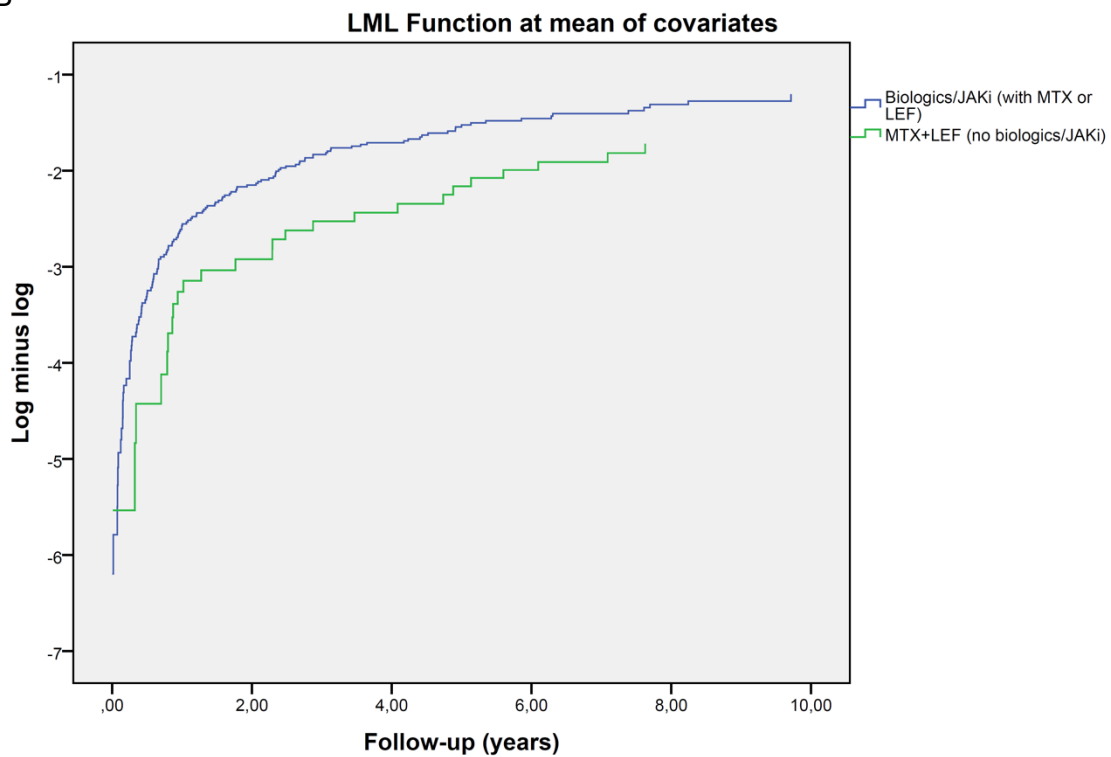

doi:10.3899/jrheum.201248.

C

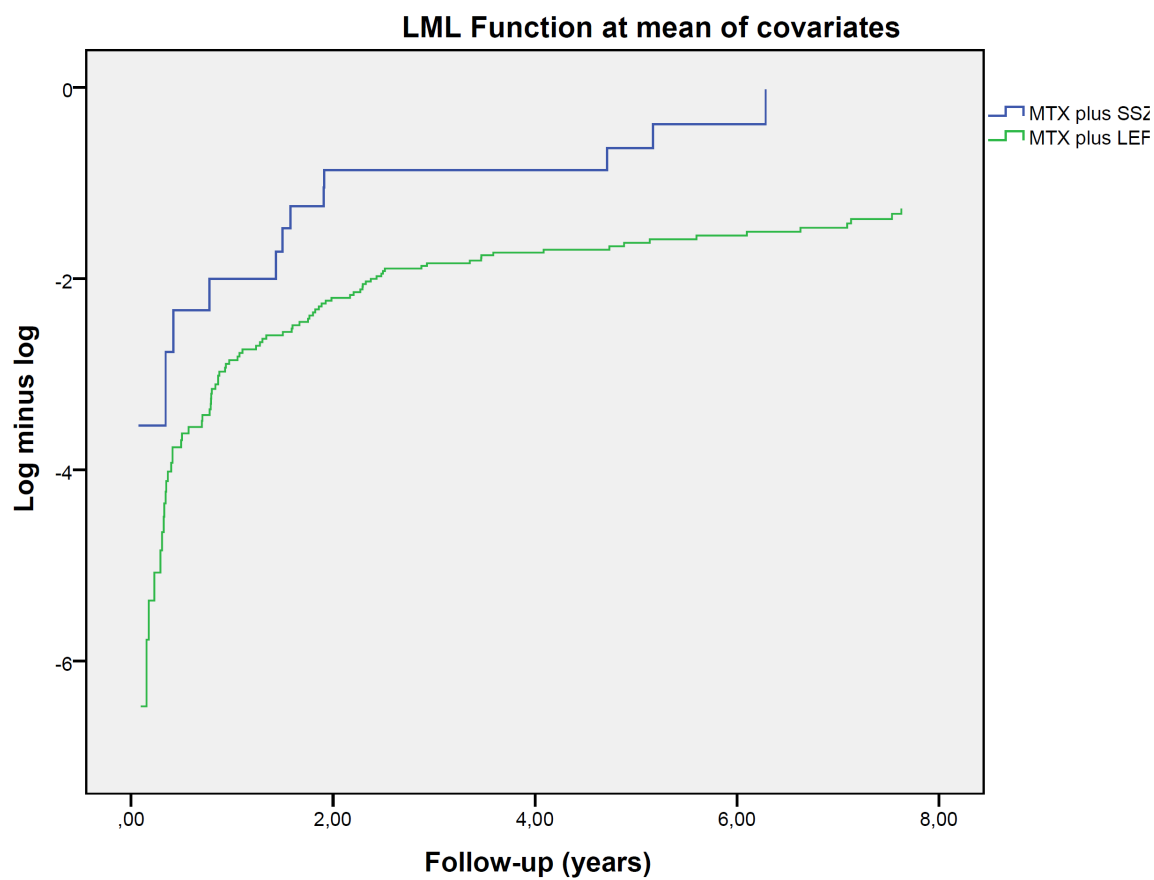

D

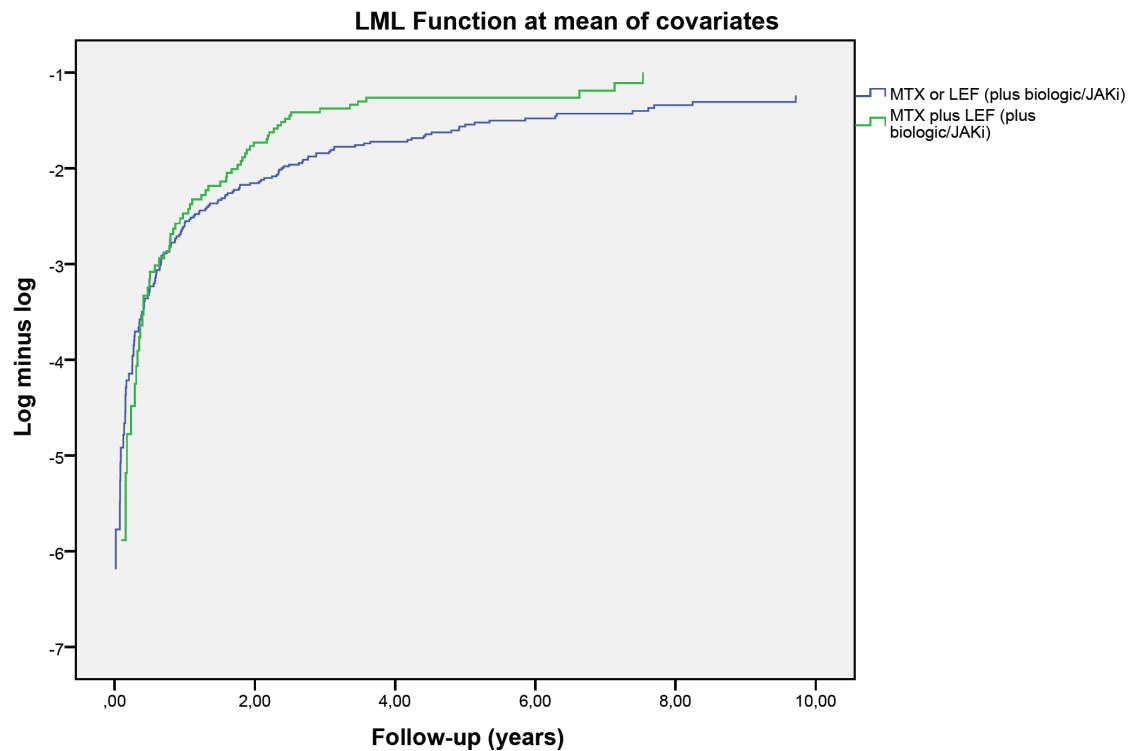

**Supplementary Data 1.** Propensity Score Matched Analysis Supplement.

SAFETY OF THE METHOTREXATE-LEFLUNOMIDE COMBINATION IN RHEUMATOID ARTHRITIS: RESULTS OF A MULTICENTRIC, REGISTRY-BASED, COHORT STUDY (BIOBADABRASIL).

**1- PROPENSITY SCORE MATCHED ANALYSIS (PSMA) USING R COMPARING THE HAZARD OF SERIOUS ADVERSE EVENTS (SAE) OF THE MTX-LEF COMBO (N=452) VERSUS A CATEGORY REPRESENTING USE OF EITHER MTX OR LEF (N=1063; REFERENCE).**

Sample sizes:

|           | Control | Treated |
|-----------|---------|---------|
| All       | 1063    | 452     |
| Matched   | 569     | 397     |
| Unmatched | 494     | 55      |
| Discarded | 0       | 0       |

**Comparison of groups generated by propensity score matching (p.c: proportion in controls; p.t: proportion in treated, stddiff: standardized difference between the groups; mean.c and sd.c: mean and standard deviation in control group, respectively; mean.t and sd.t: mean and standard deviation in treated group, respectively)**

**Categorical variables**

|                            | <b>p.c</b> | <b>p.t</b> | <b>missing.c</b> | <b>missing.t</b> | <b>stddiff</b> | <b>stddiff.l</b> | <b>stddiff.u</b> |
|----------------------------|------------|------------|------------------|------------------|----------------|------------------|------------------|
| CORTICOSTEROID             | 0.822      | 0.829      | 0                | 0                | 0.016          | -0.112           | 0.145            |
| SULFASALAZINE              | 0.021      | 0.028      | 0                | 0                | 0.043          | -0.085           | 0.171            |
| ANTIMALARIALS              | 0.188      | 0.217      | 0                | 0                | 0.071          | -0.057           | 0.199            |
| FEMALE                     | 0.872      | 0.877      | 0                | 0                | 0.015          | -0.113           | 0.143            |
| SERONEGATIVE               | 0.158      | 0.174      | 0                | 0                | 0.042          | -0.086           | 0.170            |
| CANCER                     | 0.012      | 0.010      | 0                | 0                | 0.021          | -0.107           | 0.149            |
| HYPERCHOLESTEROLEMIA       | 0.137      | 0.139      | 0                | 0                | 0.004          | -0.124           | 0.132            |
| HEPATITIS B                | 0.009      | 0.005      | 0                | 0                | 0.045          | -0.083           | 0.173            |
| HEPATITIS C                | 0.002      | 0.003      | 0                | 0                | 0.016          | -0.112           | 0.145            |
| OSTEOPOROSIS               | 0.146      | 0.154      | 0                | 0                | 0.022          | -0.106           | 0.150            |
| ISQUEMIC<br>CARDIOMYOPATHY | 0.012      | 0.008      | 0                | 0                | 0.048          | -0.080           | 0.176            |
| DIABETES                   | 0.139      | 0.121      | 0                | 0                | 0.053          | -0.075           | 0.182            |
| SMOKING                    | 0.151      | 0.169      | 0                | 0                | 0.048          | -0.080           | 0.176            |
| RENAL FAILURE              | 0.002      | 0.003      | 0                | 0                | 0.016          | -0.112           | 0.145            |
| HEART FAILURE              | 0.005      | 0.003      | 0                | 0                | 0.044          | -0.084           | 0.172            |
| COPD                       | 0.023      | 0.028      | 0                | 0                | 0.031          | -0.097           | 0.159            |
| HYPERTENSION               | 0.388      | 0.390      | 0                | 0                | 0.004          | -0.124           | 0.132            |
| BIOLOGIC/JAKi              | 0.627      | 0.589      | 0                | 0                | 0.078          | -0.050           | 0.206            |

**Continuous variables**

|            | <b>mean.c</b> | <b>sd.c</b> | <b>mean.t</b> | <b>sd.t</b> | <b>missing.c</b> | <b>missing.t</b> | <b>stddiff</b> |
|------------|---------------|-------------|---------------|-------------|------------------|------------------|----------------|
| Age (days) | 18527.174     | 4303.850    | 18425.013     | 4251.795    | 0                | 0                | 0.024          |



doi:10.3899/jrheum.201248.

|                         |          |          |          |          |   |   |       |
|-------------------------|----------|----------|----------|----------|---|---|-------|
| Disease duration (days) | 2779.116 | 2877.369 | 2972.680 | 2907.921 | 0 | 0 | 0.067 |
| Starting year           | 12.408   | 3.059    | 12.222   | 2.750    | 0 | 0 | 0.064 |
| DAS28                   | 5.153    | 1.552    | 5.081    | 1.376    | 0 | 0 | 0.049 |

### Distribution of Propensity Scores

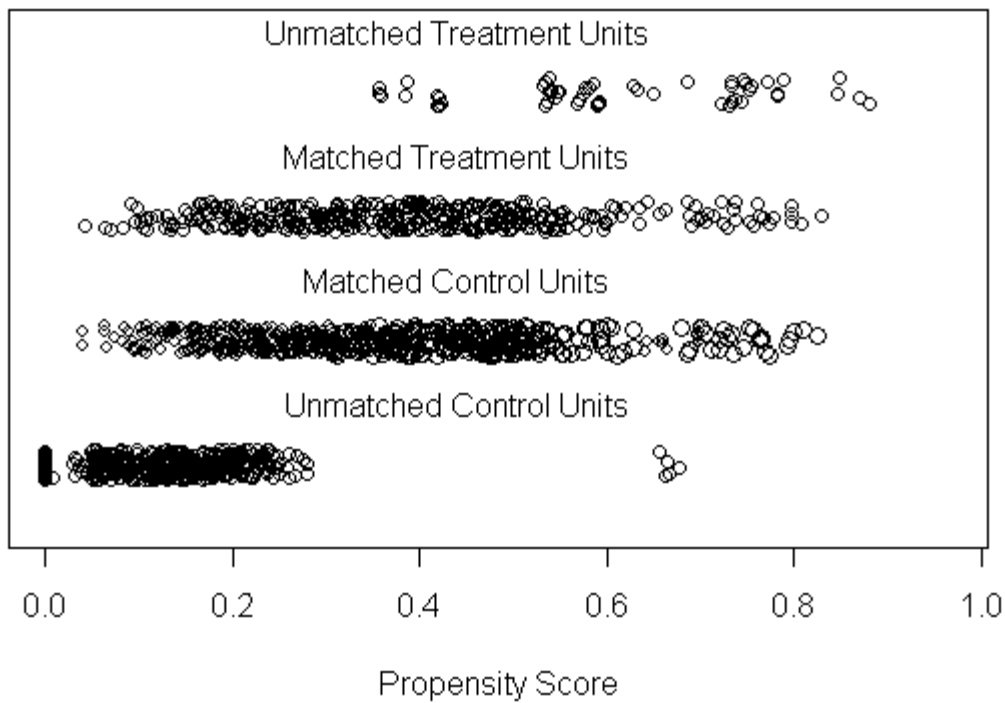

doi:10.3899/jrheum.201248.

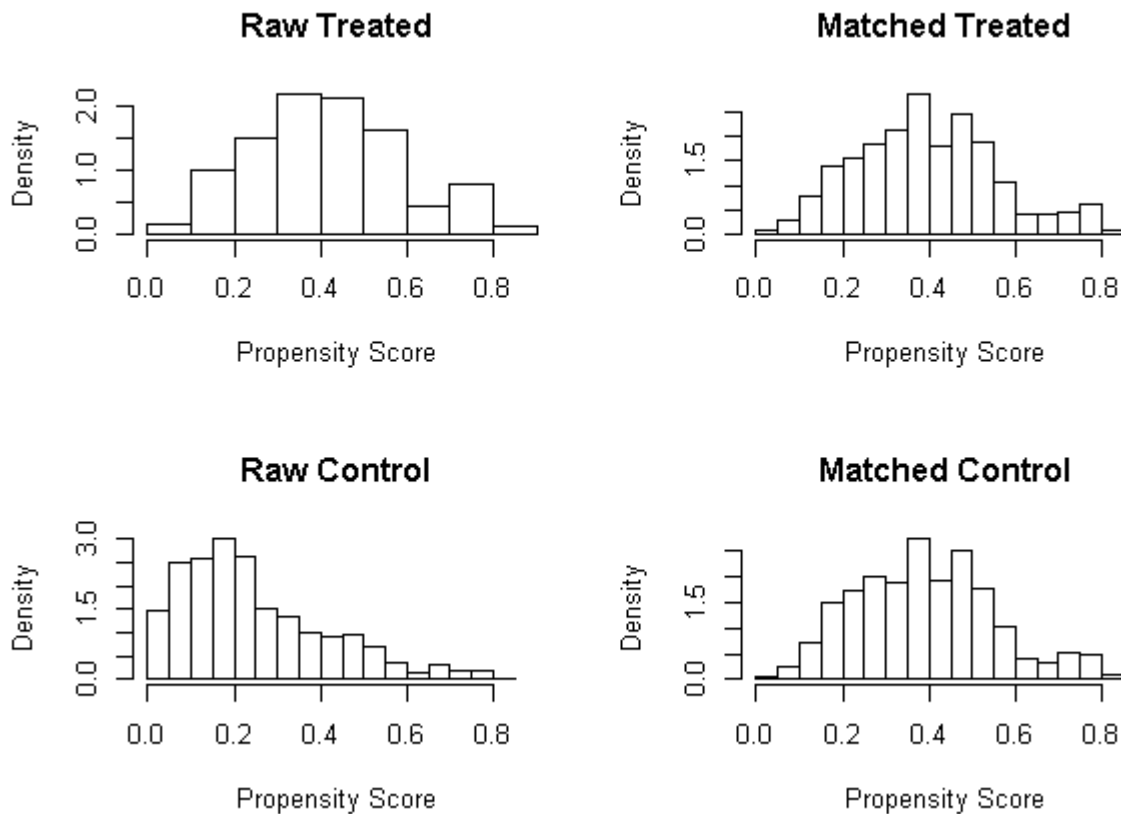

**Results of this PSMA:**

```
coxph(formula = Surv(FOLLOW, EF_ADV) ~ MTXpLEFLU, data = matched.def1,
      method = "breslow")
```

n= 966, number of events= 177

|           | coef     | exp(coef) | se(coef) | z      | Pr(> z ) |
|-----------|----------|-----------|----------|--------|----------|
| MTXpLEFLU | -0.05507 | 0.94641   | 0.15374  | -0.358 | 0.72     |

|           | exp(coef) | exp(-coef) | lower .95 | upper .95 |
|-----------|-----------|------------|-----------|-----------|
| MTXpLEFLU | 0.9464    | 1.057      | 0.7002    | 1.279     |

**FINAL RESULT:**

HAZARD RATIO: 0.95, 95% confidence interval: 0.70 to 1.28, P= 0.720.

**2- PROPENSITY SCORE MATCHED ANALYSIS (PSMA) USING R COMPARING THE HAZARD OF SERIOUS ADVERSE EVENTS (SAE) OF THE MTX-LEF COMBO (N=195) VERSUS BIOLOGIC AGENTS/JAK INHIBITOR (COMBINED WITH EITHER MTX OR LEF; N=775)..**

Sample sizes:

|           | Control | Treated |
|-----------|---------|---------|
| All       | 775     | 195     |
| Matched   | 257     | 157     |
| Unmatched | 518     | 38      |
| Discarded | 0       | 0       |

**Comparison of groups generated by propensity score matching (p.c: proportion in controls; p.t: proportion in treated, stddiff: standardized difference between the groups; mean.c and sd.c: mean and standard deviation in control group, respectively; mean.t and sd.t: mean and standard deviation in treated group, respectively)**

**Categorical variables**

|                      | p.c   | p.t   | missing.c | missing.t | stddiff | stddiff.l | stddiff.u |
|----------------------|-------|-------|-----------|-----------|---------|-----------|-----------|
| CORTICOSTEROID       | 0.837 | 0.841 | 0         | 0         | 0.011   | -0.187    | 0.210     |
| SULFASALAZINE        | 0.012 | 0.013 | 0         | 0         | 0.010   | -0.189    | 0.208     |
| ANTIMALARIALS        | 0.222 | 0.229 | 0         | 0         | 0.018   | -0.181    | 0.217     |
| FEMALE               | 0.875 | 0.860 | 0         | 0         | 0.046   | -0.152    | 0.245     |
| SERONEGATIVE         | 0.125 | 0.153 | 0         | 0         | 0.082   | -0.117    | 0.281     |
| CANCER               | 0.019 | 0.013 | 0         | 0         | 0.053   | -0.145    | 0.252     |
| HYPERCHOLESTEROLEMIA | 0.156 | 0.146 | 0         | 0         | 0.026   | -0.173    | 0.224     |

doi:10.3899/jrheum.201248.

|                            |       |       |   |   |       |        |       |
|----------------------------|-------|-------|---|---|-------|--------|-------|
| HEPATITIS B                | 0.000 | 0.000 | 0 | 0 | NaN   | NaN    | NaN   |
| HEPATITIS C                | 0.000 | 0.000 | 0 | 0 | NaN   | NaN    | NaN   |
| OSTEOPOROSIS               | 0.160 | 0.159 | 0 | 0 | 0.001 | -0.198 | 0.199 |
| ISQUEMIC<br>CARDIOMYOPATHY | 0.012 | 0.019 | 0 | 0 | 0.060 | -0.138 | 0.259 |
| DIABETES                   | 0.125 | 0.108 | 0 | 0 | 0.051 | -0.148 | 0.249 |
| SMOKING                    | 0.152 | 0.140 | 0 | 0 | 0.033 | -0.166 | 0.231 |
| RENAL FAILURE              | 0.004 | 0.006 | 0 | 0 | 0.035 | -0.164 | 0.233 |
| HEART FAILURE              | 0.004 | 0.013 | 0 | 0 | 0.098 | -0.101 | 0.296 |
| COPD                       | 0.031 | 0.025 | 0 | 0 | 0.034 | -0.164 | 0.233 |
| HYPERTENSION               | 0.374 | 0.369 | 0 | 0 | 0.009 | -0.190 | 0.207 |

### Continuous variables

|                         | <b>mean.c</b> | <b>sd.c</b> | <b>mean.t</b> | <b>sd.t</b> | <b>missing.c</b> | <b>missing.t</b> | <b>stddiff</b> |
|-------------------------|---------------|-------------|---------------|-------------|------------------|------------------|----------------|
| Age (days)              | 18367.307     | 4103.220    | 18307.484     | 4677.722    | 0                | 0                | 0.014          |
| Disease duration (days) | 2763.677      | 2283.391    | 2590.045      | 3167.834    | 0                | 0                | 0.063          |
| Starting year           | 12.058        | 3.145       | 11.892        | 2.861       | 0                | 0                | 0.055          |
| DAS28                   | 5.082         | 1.475       | 4.975         | 1.414       | 0                | 0                | 0.074          |

### Distribution of Propensity Scores

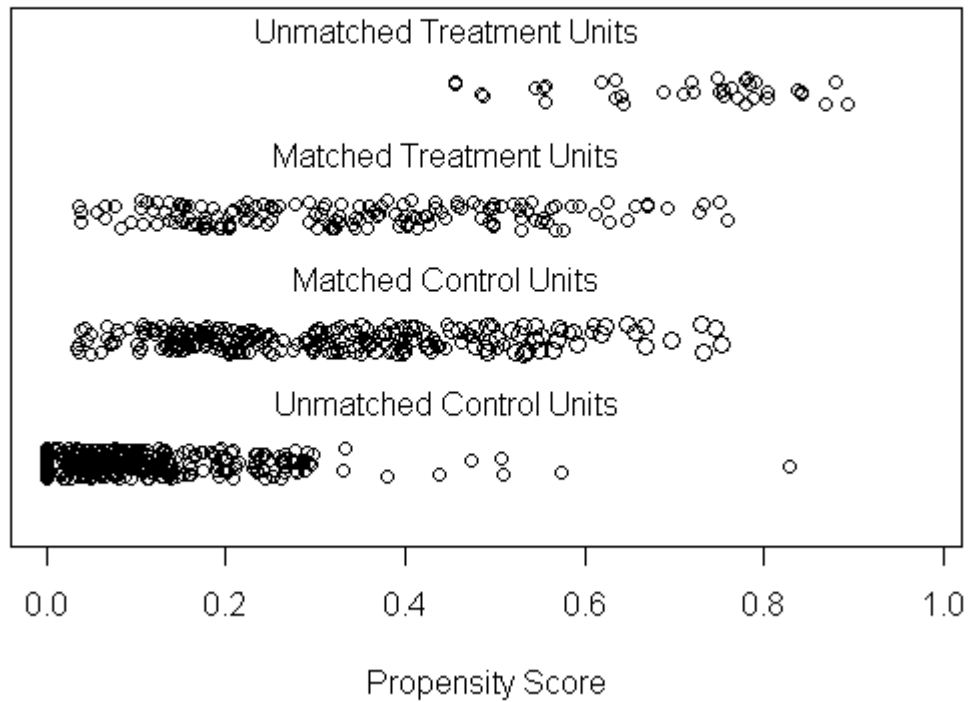

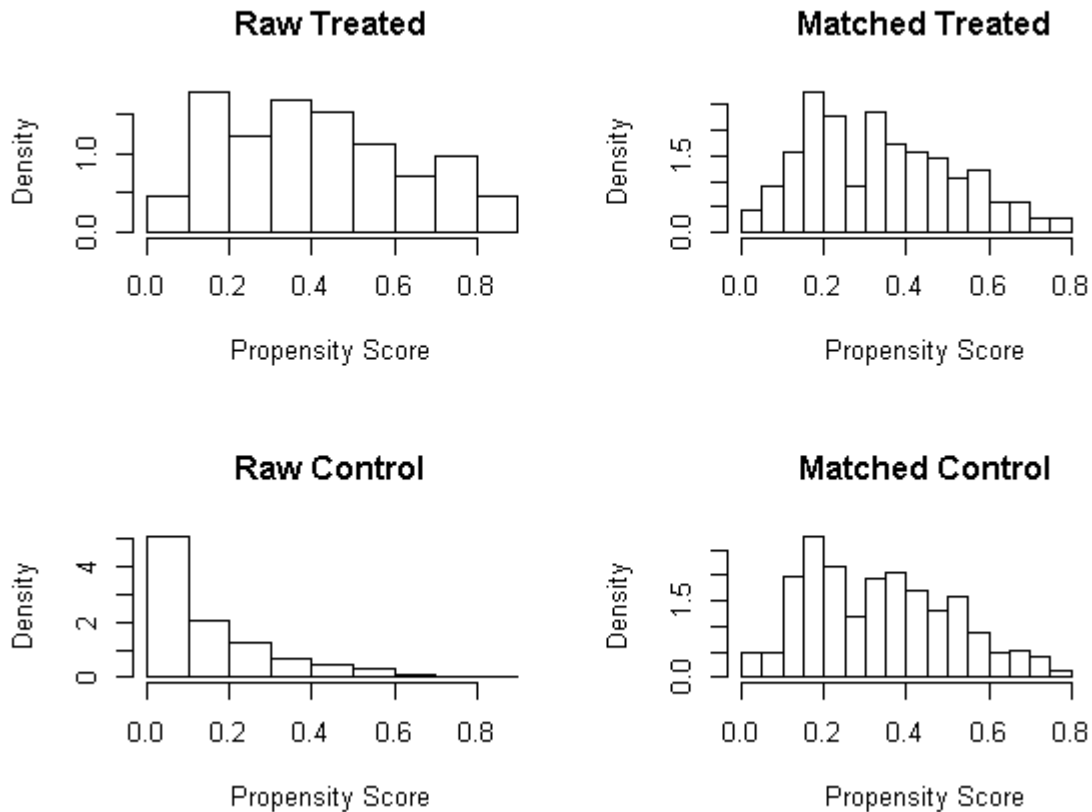

**Results of this PSMA:**

```
coxph(formula = Surv(FOLLOW, EF_ADV) ~ MTXLEFBIO, data = matched.def1,
      method = "breslow")
```

n= 414, number of events= 77

|           | coef    | exp(coef) | se(coef) | z      | Pr(> z )   |
|-----------|---------|-----------|----------|--------|------------|
| MTXLEFBIO | -0.7113 | 0.4910    | 0.2538   | -2.802 | 0.00507 ** |

---  
Signif. codes: 0 '\*\*\*' 0.001 '\*\*' 0.01 '\*' 0.05 '.' 0.1 ' ' 1

|           | exp(coef) | exp(-coef) | lower .95 | upper .95 |
|-----------|-----------|------------|-----------|-----------|
| MTXLEFBIO | 0.491     | 2.037      | 0.2986    | 0.8075    |

**FINAL RESULT:**

HAZARD RATIO: 0.49, 95% confidence interval: 0.30 to 0.81, P=0.005.

### **3-PROPENSITY SCORE MATCHED ANALYSIS (PSMA) USING R COMPARING THE HAZARD OF SERIOUS ADVERSE EVENTS (SAE) OF THE MTX-LEF COMBO VERSUS THE MTX-SSZ COMBO.**

Matching was not adequate due to the reduced number of patients in the MTX-SSZ group, generating standardized differences up to 0.7 for some explanatory variables compounding the propensity scores.

### **4-PROPENSITY SCORE MATCHED ANALYSIS (PSMA) USING R COMPARING THE HAZARD OF SERIOUS ADVERSE EVENTS (SAE) BETWEEN THE MTX-LEF COMBO AND USE OF MTX OR LEF AMONG PATIENTS ON TREATMENT WITH BIOLOGIC AGENT OR JANUS KINASE INHIBITOR.**

Sample sizes:

|           | Control | Treated |
|-----------|---------|---------|
| All       | 775     | 257     |
| Matched   | 306     | 200     |
| Unmatched | 469     | 57      |
| Discarded | 0       | 0       |

**Comparison of groups generated by propensity score matching (p.c: proportion in controls; p.t: proportion in treated, stfdiff: standardized difference between the groups; mean.c and sd.c: mean and standard deviation in control group, respectively; mean.t and sd.t: mean and standard deviation in treated group, respectively)**

### Categorical variables

|                            | p.c   | p.t   | missing.c | missing.t | stddiff | stddiff.l | stddiff.u |
|----------------------------|-------|-------|-----------|-----------|---------|-----------|-----------|
| CORTICOSTEROID             | 0.784 | 0.800 | 0         | 0         | 0.039   | -0.140    | 0.217     |
| SULFASALAZINE              | 0.033 | 0.040 | 0         | 0         | 0.039   | -0.139    | 0.217     |
| ANTIMALARIALS              | 0.137 | 0.170 | 0         | 0         | 0.091   | -0.087    | 0.269     |
| FEMALE                     | 0.876 | 0.880 | 0         | 0         | 0.013   | -0.165    | 0.191     |
| SERONEGATIVE               | 0.167 | 0.175 | 0         | 0         | 0.022   | -0.156    | 0.200     |
| CANCER                     | 0.010 | 0.010 | 0         | 0         | 0.002   | -0.176    | 0.180     |
| HYPERCHOLESTEROLEMIA       | 0.154 | 0.145 | 0         | 0         | 0.024   | -0.154    | 0.202     |
| HEPATITIS B                | 0.007 | 0.010 | 0         | 0         | 0.038   | -0.140    | 0.216     |
| HEPATITIS C                | 0.003 | 0.000 | 0         | 0         | 0.081   | -0.097    | 0.259     |
| OSTEOPOROSIS               | 0.147 | 0.175 | 0         | 0         | 0.076   | -0.102    | 0.254     |
| ISQUEMIC<br>CARDIOMYOPATHY | 0.010 | 0.005 | 0         | 0         | 0.056   | -0.122    | 0.234     |
| DIABETES                   | 0.137 | 0.160 | 0         | 0         | 0.064   | -0.114    | 0.242     |
| SMOKING                    | 0.137 | 0.130 | 0         | 0         | 0.021   | -0.157    | 0.200     |
| RENAL FAILURE              | 0.000 | 0.000 | 0         | 0         | NaN     | NaN       | NaN       |
| HEART FAILURE              | 0.003 | 0.005 | 0         | 0         | 0.027   | -0.151    | 0.205     |
| COPD                       | 0.016 | 0.020 | 0         | 0         | 0.027   | -0.151    | 0.206     |
| HYPERTENSION               | 0.379 | 0.400 | 0         | 0         | 0.043   | -0.135    | 0.221     |

### Continuous variables

|                         | mean.c    | sd.c     | mean.t    | sd.t     | missing.c | missing.t | stddiff |
|-------------------------|-----------|----------|-----------|----------|-----------|-----------|---------|
| Age (days)              | 18534.405 | 4197.968 | 18903.390 | 3769.770 | 0         | 0         | 0.092   |
| Disease duration (days) | 3681.745  | 3055.755 | 3626.360  | 2912.342 | 0         | 0         | 0.019   |
| Starting year           | 12.605    | 3.010    | 12.515    | 2.755    | 0         | 0         | 0.031   |
| DAS28                   | 5.235     | 1.429    | 5.155     | 1.307    | 0         | 0         | 0.059   |



### Distribution of Propensity Scores

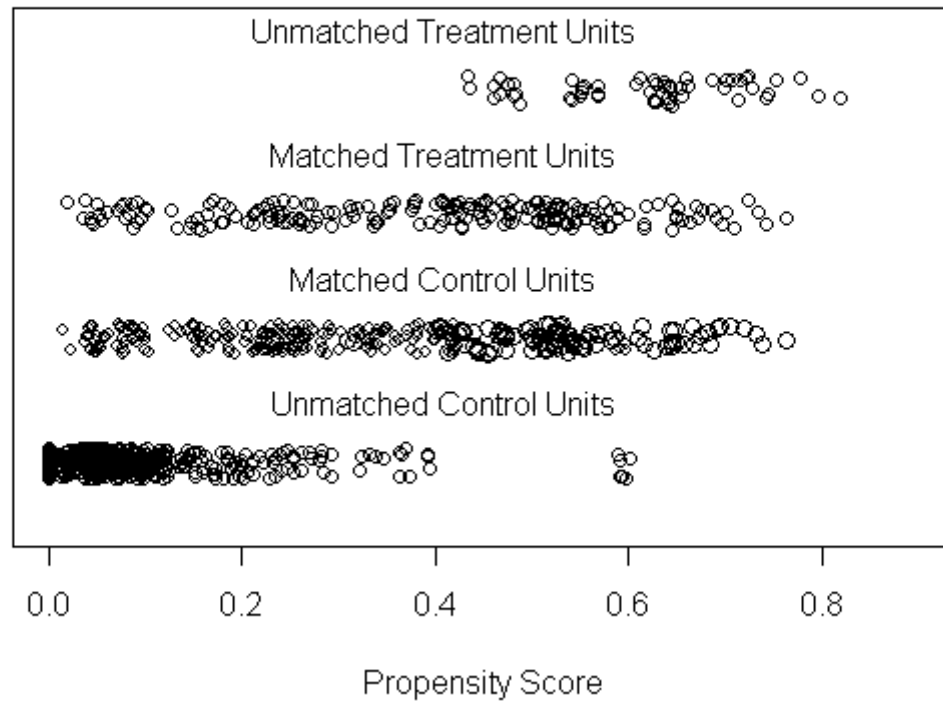

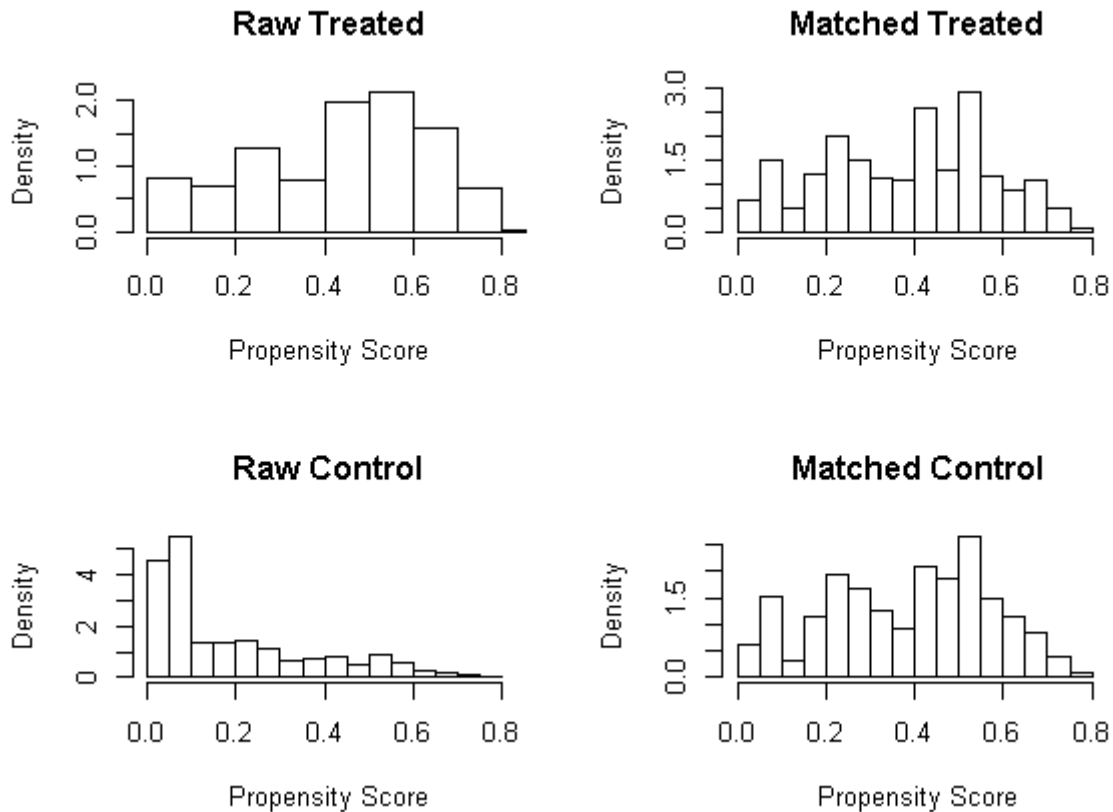

**Results of this PSMA:**

```
coxph(formula = Surv(FOLLOW, EF_ADV) ~ TTO2, data = matched.def1,
      method = "breslow")
```

n= 506, number of events= 88

|      | coef    | exp(coef) | se(coef) | z     | Pr(> z ) |
|------|---------|-----------|----------|-------|----------|
| TTO2 | 0.08307 | 1.08661   | 0.21700  | 0.383 | 0.702    |

|      | exp(coef) | exp(-coef) | lower .95 | upper .95 |
|------|-----------|------------|-----------|-----------|
| TTO2 | 1.087     | 0.9203     | 0.7102    | 1.663     |

**FINAL RESULT:**

HAZARD RATIO: 1.09, 95% confidence interval: 0.71 to 1.66, P=0.702.
